# Supplementary material for: Cu–Bpin-mediated dimerization of 4,4-dichloro-2-butenoic acid derivatives enables the synthesis of densely functionalized cyclopropanes
Source: publisher site journal article supplement (doi:10.3762/bjoc.21.71), 2025-05-05
Supplement: Additional file 1 [file 1860-5397-21-71-S1.pdf]

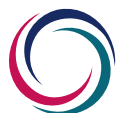

## Supporting Information

for

### **Cu–Bpin-mediated dimerization of 4,4-dichloro-2-butenic acid derivatives enables the synthesis of densely functionalized cyclopropanes**

Patricia Gómez-Roibás, Andrea Chaves-Pouso and Martín Fañanás-Mastral

*Beilstein J. Org. Chem.* **2025**, *21*, 877–883. [doi:10.3762/bjoc.21.71](https://doi.org/10.3762/bjoc.21.71)

### **Experimental procedures, characterization data and copies of NMR spectra**

## Table of contents

|                                                                                                                                 |     |
|---------------------------------------------------------------------------------------------------------------------------------|-----|
| 1. General methods .....                                                                                                        | S2  |
| 2. List of starting materials and ligands.....                                                                                  | S3  |
| 3. Synthesis of 4,4-dichloro-2-butenic acid derivatives .....                                                                   | S4  |
| 4. General procedures .....                                                                                                     | S6  |
| • General procedure for the copper-catalyzed dimerization of 4,4-dichloro-2-butenic acid derivatives (general procedure B)..... | S6  |
| • General procedure for the synthesis of (2,2-dichlorovinyl)cyclopropanes (general procedure C) .....                           | S6  |
| • Procedures for the synthesis of chlorocyclopropane <b>20</b> . ....                                                           | S6  |
| 5. Experimental details for Scheme 3.....                                                                                       | S7  |
| 6. Optimization studies towards the synthesis of cyclopropane <b>16</b> .....                                                   | S8  |
| 7. Product characterization .....                                                                                               | S9  |
| 8. NMR spectra .....                                                                                                            | S12 |
| 9. Stereochemical determination of products by NOESY experiment .....                                                           | S27 |

## 1. General methods

- All reactions were performed under argon atmosphere using oven-dried glassware and using standard Schlenk techniques. Solvents were dried using an MBraun SPS 800 system. All chemicals were purchased from Aldrich Chemical Co. Ltd., Alfa Aesar, Fluorochem Ltd. or TCI Europe N.V. chemical companies and used without further purification, unless otherwise noted.
- Analytical thin-layer chromatography was carried out on silica-coated aluminium plates (silica gel 60 F254 Merck) and components were visualized by UV light and KMnO<sub>4</sub> staining. Flash column chromatography was performed on silica gel 60 (Merck, 230–400 mesh) without previous deactivation.
- GC–MS analyses were performed in an Agilent instrument GC-6890N equipped with Chemical Ionization (CI) MS-5973 detector.
- High resolution mass spectrometry was carried out on a Bruker micro TOF spectrometer using APCI.
- <sup>1</sup>H, <sup>13</sup>C, COSY, HSQC, HMBC and NOESY NMR experiments were carried out using a Varian Inova 500 MHz or a Varian Mercury 300 MHz NMR spectrometer. Chemical shift values are reported in ppm with the solvent resonance as the internal standard (CHCl<sub>3</sub>: δ 7.26 for <sup>1</sup>H, δ 77.2 for <sup>13</sup>C). Coupling constants (*J*) are given in hertz (Hz). Multiplicities are reported as follows: s = singlet, d = doublet, t = triplet, q = quartet, m = multiplet or as a combination of them.
- In order to preclude side reactions, B<sub>2</sub>pin<sub>2</sub> was dried over Na<sub>2</sub>SO<sub>4</sub> prior to being used.

## 2. List of starting materials and ligands.

Substrates **1** and **4–7** were prepared according to a modified literature procedure<sup>1</sup> (see below, general procedure A). Substrates **13–15** and ligands were purchased from commercial sources and used without further purification.

- Substrates:

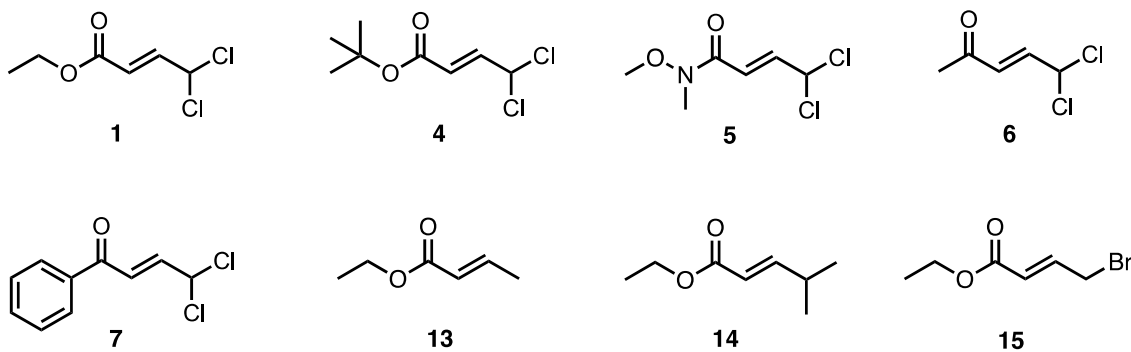

- Ligands:

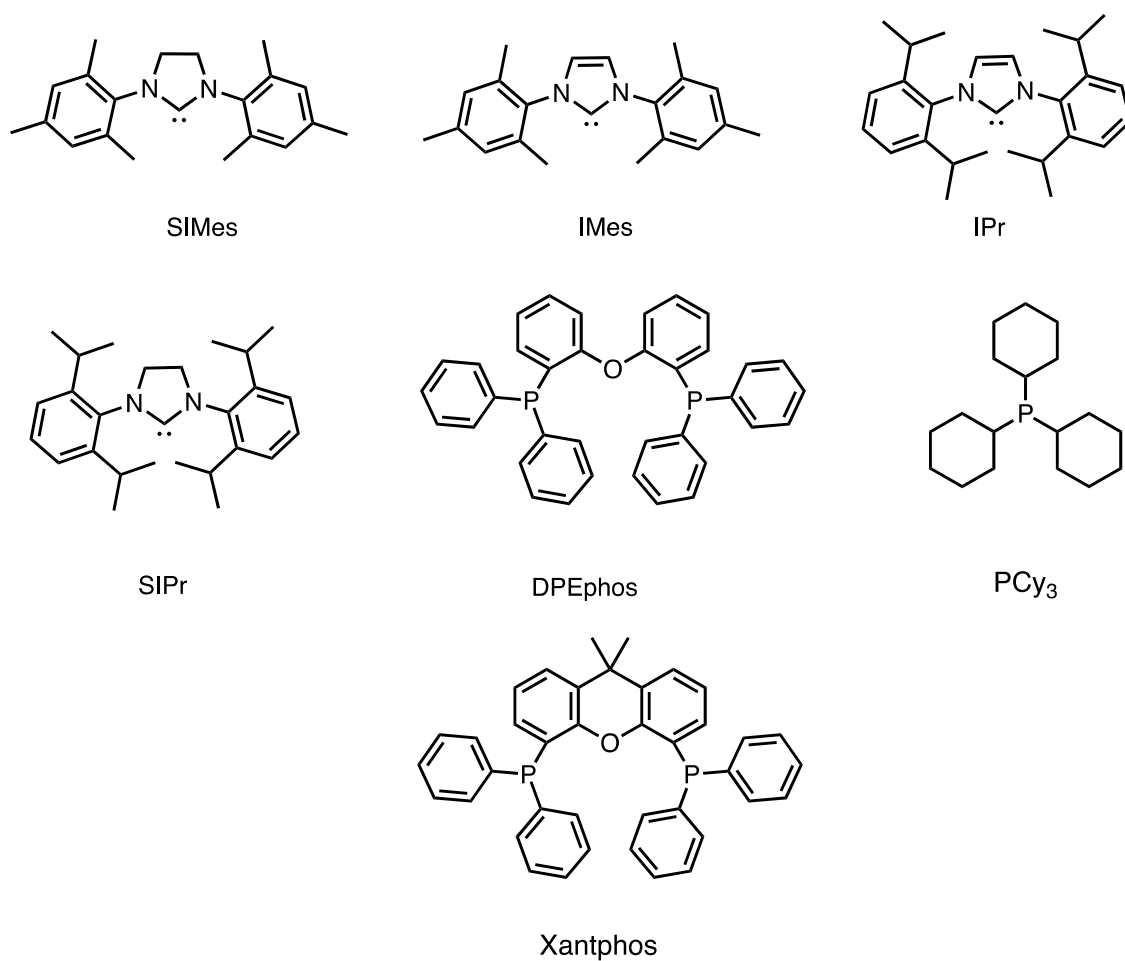

<sup>1</sup> Giannerini, M.; Fañanás-Mastral, M.; Feringa, B. L. *J. Am. Chem. Soc.* **2012**, *134*, 4108–4111.

### 3. Synthesis of 4,4-dichloro-2-butenic acid derivatives

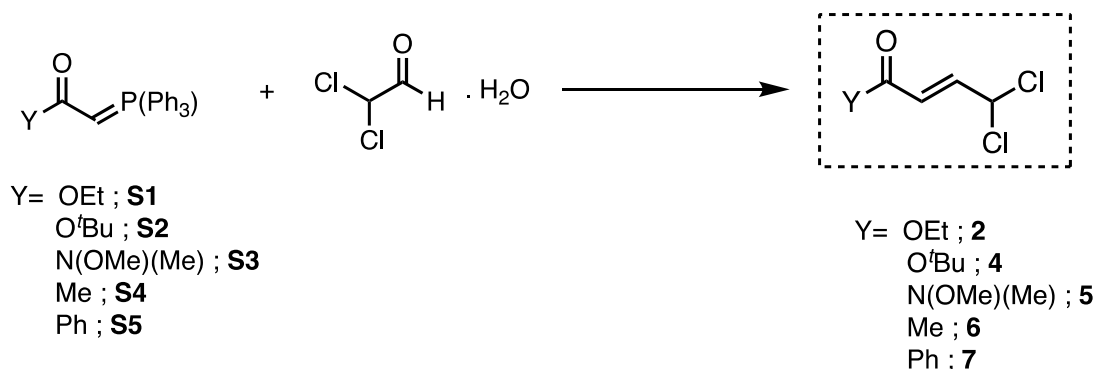

#### General procedure A:

In a two-necked flask under argon atmosphere equipped with a magnetic stirring bar, 1,1-dichloroacetaldehyde hydrate (1 equiv) was added to a solution of the corresponding phosphorus ylide (1.5 equiv) in dry DCM at 0 °C. The mixture was allowed to reach room temperature and stirred for 4 hours. The resulting mixture was extracted with a saturated aqueous solution of NH<sub>4</sub>Cl and dichloromethane (3 × 30mL). The combined organic layers were dried over anhydrous Na<sub>2</sub>SO<sub>4</sub>, filtered, and the solvent was removed under reduced pressure. The crude product was purified through flash column chromatography using the indicated mixture of solvents as eluent.

Note: phosphorus ylides **S1**, **S2**, **S3**, **S4** and **S5** were purchased from commercial sources.

#### Ethyl (*E*)-4,4-dichlorobut-2-enoate (**1**)<sup>1</sup>

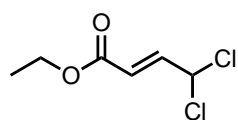

Synthesized from **S1** according to general procedure A. Yellow oil obtained in 42% yield (569.6 mg) after flash column chromatography on silica gel (hexane:AcOEt, 200:1). <sup>1</sup>H NMR (300 MHz, CDCl<sub>3</sub>) δ 7.02 (dd, *J* = 15.3, 6.8 Hz, 1H), 6.25 (d, *J* = 6.8 Hz, 1H), 6.15 (dd, *J* = 15.3, 1.1 Hz, 1H), 4.25 (q, *J* = 7.1 Hz, 2H), 1.32 (t, *J* = 7.1 Hz, 3H). <sup>13</sup>C NMR (300 MHz, CDCl<sub>3</sub>) δ 164.9 (C), 142.4 (CH), 123.1 (CH), 68.1 (CH), 61.2 (CH<sub>2</sub>), 14.1 (CH<sub>3</sub>) ppm.

#### *tert*-Butyl (*E*)-4,4-dichlorobut-2-enoate (**4**)<sup>1</sup>

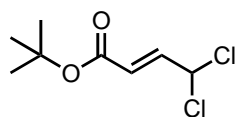

Synthesized from **S2** according to general procedure A. Yellow oil obtained in 43% yield (728.4 mg) after flash column chromatography on silica gel (hexane:AcOEt, 200:1). <sup>1</sup>H NMR (300 MHz, CDCl<sub>3</sub>) δ 6.86 (dd, *J* = 15.6, 7.3 Hz, 1H), 6.22 (d, *J* = 6.9 Hz, 1H), 6.02 (d, *J* = 15.2 Hz, 1H), 1.45 (s, 9H) ppm. <sup>13</sup>C NMR (300 MHz, cdcl<sub>3</sub>) δ 163.7 (C), 141.4 (CH), 124.9 (CH), 82.0 (C), 68.2 (CH), 27.7 (3xCH<sub>3</sub>) ppm.

**(E)-4,4-Dichloro-N-methoxy-N-methylbut-2-enamide (5)**

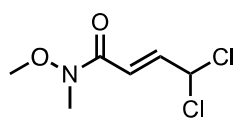

Synthesized from **S3** according to general procedure A. Colorless oil obtained in 67% yield (663.3 mg) after flash column chromatography on silica gel (hexane:AcOEt, 100:5). **<sup>1</sup>H NMR** (300 MHz, CDCl<sub>3</sub>) δ 7.05 (dd, *J* = 15.1, 6.8 Hz, 1H), 6.74 (dd, *J* = 15.1, 1.1 Hz, 1H), 6.32 (dd, *J* = 6.8, 1.0 Hz, 1H), 3.73 (s, 3H), 3.27 (s, 3H) ppm. **<sup>13</sup>C NMR** (300 MHz, CDCl<sub>3</sub>) δ 164.6 (C), 141.8 (CH), 120.7 (CH), 68.8 (CH), 62.0 (CH<sub>3</sub>), 32.4 (CH<sub>3</sub>) ppm. **HRMS (APCI)** Calc. for C<sub>6</sub>H<sub>10</sub>Cl<sub>2</sub>NO<sub>2</sub> [M+H<sup>+</sup>]: 198.0083, found: 198.0088.

**(E)-5,5-Dichloropent-3-en-2-one (6)**

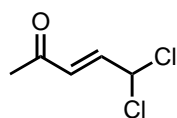

Synthesized from **S4** according to general procedure A. Yellow oil obtained in 6% yield (124.5 mg) after flash column chromatography on silica gel (hexane:AcOEt, 200:1). **<sup>1</sup>H NMR** (300 MHz, CDCl<sub>3</sub>) δ 6.83 (dd, *J* = 15.5, 7.0 Hz, 1H), 6.28 (m, 2H), 2.31 (s, 3H) ppm. **<sup>13</sup>C NMR** (300 MHz, CDCl<sub>3</sub>) δ 197.0 (C), 140.9 (CH), 130.2 (CH), 68.5 (CH), 27.9 (CH<sub>3</sub>) ppm.

**(E)-4,4-Dichloro-1-phenylbut-2-en-1-one (7)**

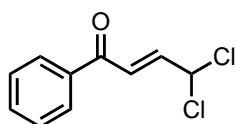

Synthesized from **S5** according to general procedure A. Yellow oil obtained in 42% yield (272.3 mg) after flash column chromatography on silica gel (hexane:AcOEt, 200:1). **<sup>1</sup>H NMR** (300 MHz, CDCl<sub>3</sub>) δ 7.80 (m, 2H), 7.55 (m, 3H), 7.21 (dd, *J* = 15.0, 0.9 Hz, 1H), 7.07 (dd, *J* = 15.1, 6.3 Hz, 1H), 6.40 (dd, *J* = 6.4, 0.9 Hz, 1H) ppm. **<sup>13</sup>C NMR** (300 MHz, CDCl<sub>3</sub>) δ 189.2 (C), 141.9 (CH), 136.9 (C), 133.6 (2xCH), 128.89 (2xCH), 128.7 (CH), 126.1 (CH), 68.7 (CH) ppm. **HRMS (APCI)** Calc. for C<sub>10</sub>H<sub>9</sub>Cl<sub>2</sub>O [M+H<sup>+</sup>]: 215.0025, found: 215.0018.

## 4. General procedures

- **General procedure for the copper-catalyzed dimerization of 4,4-dichloro-2-butenic acid derivatives (general procedure B)**

A dry reaction tube equipped with a magnetic stirring bar was charged with CuCl (10 mol %, 1.98 mg) and SIPr (10 mol %, 9.56 mg) and placed under argon via three evacuation/backfill cycles. Then, dry toluene (0.5 mL) was added, and the resulting solution was stirred for 30 min. The obtained solution was added to a Schlenk flask containing B<sub>2</sub>pin<sub>2</sub> (0.2 mmol, 50.79 mg) and LiOt-Bu (0.4 mmol, 32.02 mg) followed by vacuum/argon cycles. A solution of the corresponding 4,4-dichloro-2-butenic acid derivative (0.2 mmol) in toluene (1 mL) was then added. The mixture was stirred at 30 °C for 18 h and the resulting crude was filtered through celite to remove the catalyst. After this, the mixture was concentrated under reduced pressure and analyzed by GC–MS and <sup>1</sup>H NMR spectroscopy to determine the conversion and product distribution. Finally, the crude product was purified through flash column chromatography using the indicated mixture of solvents as eluent.

- **General procedure for the synthesis of (2,2-dichlorovinyl)cyclopropanes (General procedure C)**

In a pre-dried vial with a magnetic stirring bar, a solution of the dimerization product was added and heated at 50 °C for 18 h under argon. The resulting crude was extracted with a saturated aqueous solution of NH<sub>4</sub>Cl and dichloromethane (3 × 10 mL). The organic phase was dried with anhydrous Na<sub>2</sub>SO<sub>4</sub>, filtered, and concentrated under reduced pressure. The crude obtained was purified by column chromatography using the indicated mixture of solvents as eluent.

- **Procedures for the synthesis of chlorocyclopropane 20.**

From 5 (procedure D): A dry reaction tube equipped with a magnetic stirring bar was charged with CuCl (10 mol %, 1.98 mg) and SIPr (10 mol %, 9.56 mg) and placed under argon via three evacuation/backfill cycles. Then, dry toluene (0.5 mL) was added, and the resulting solution was stirred for 30 min. The obtained solution was added to a Schlenk flask, containing B<sub>2</sub>pin<sub>2</sub> (0.2 mmol, 50.79 mg) and KOt-Bu (0.4 mmol, 44.88 mg) followed by vacuum/argon cycles. A solution of **5** (0.2 mmol, 39.40 mg) in toluene (1 mL) was then added. The mixture was stirred at 30 °C for 18 h. Finally, the crude product was purified through flash column chromatography (AcOEt/hexane 60:40).

From 9 (procedure E): A pre-dried vial with a magnetic stirring bar was charged with KOt-Bu (0.2 mmol, 22.44 mg) and placed under argon via three evacuation/backfill cycles. Then, a solution of **9** (0.1 mmol, 39.60 mg) in toluene (1 mL) was added and the resulting mixture was stirred at 30 °C for 18 h. The solution was extracted with a saturated aqueous solution of NH<sub>4</sub>Cl and dichloromethane (3 × 10 mL). The combined organic layers were dried with anhydrous Na<sub>2</sub>SO<sub>4</sub>, filtered and concentrated under reduced pressure. The crude product was purified by column chromatography (AcOEt/hexane 60:40).

## 5. Experimental details for Scheme 3

Scheme 3a: performed according to general procedure B without the addition of B<sub>2</sub>pin<sub>2</sub>.

Scheme 3b:

Synthesis of **2**: performed according to general procedure B. To the final mixture MeOH (0.4 mmol, 16.2  $\mu$ L) was added.

Synthesis of **12**: A dry reaction tube equipped with a magnetic stirring bar was charged with CuCl (3 mol %, 0.6 mg) and DPEPhos (3 mol %, 3.2 mg) and placed under argon via three evacuation/backfill cycles. Then, dry toluene (0.5 mL) was added, and the resulting solution was stirred for 30 min. The obtained solution was added to a Schlenk flask containing B<sub>2</sub>pin<sub>2</sub> (0.2 mmol, 50.8 mg) and LiOt-Bu (9 mol %, 1.5 mg) followed by three vacuum/argon cycles. A solution of the corresponding 4,4-dichloro-2-butenic acid derivative (0.2 mmol) in toluene (1 mL) was then added. Finally, MeOH (0.4 mmol, 16.2  $\mu$ L) was added and the mixture stirred at 30 °C for 18 h. The resulting crude was filtered through celite to remove the catalyst. After this, the mixture was concentrated under reduced pressure and analyzed by GC–MS and <sup>1</sup>H NMR spectroscopy to determine the conversion and product distribution.



## 6. Optimization studies towards the synthesis of cyclopropane 16

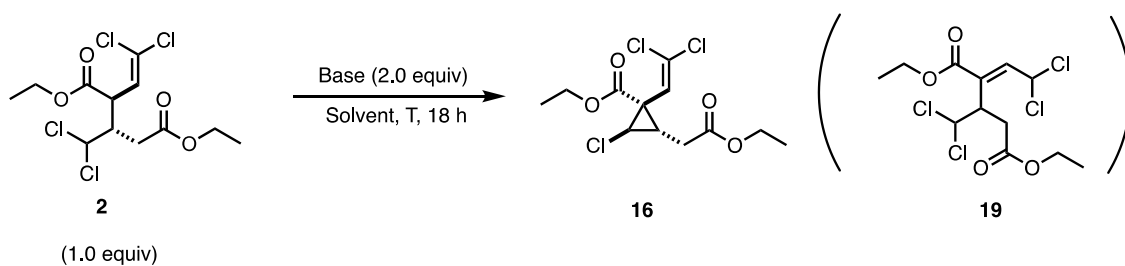

| Entry <sup>[a]</sup>    | Base                            | T (°C) | Solvent | Conv. <sup>[b]</sup> | Yield <b>16</b><br>(%) <sup>[c]</sup> | dr <sup>[d]</sup> |
|-------------------------|---------------------------------|--------|---------|----------------------|---------------------------------------|-------------------|
| <b>1</b>                | DBU                             | 40     | DCM     | 100                  | -                                     | -                 |
| <b>2</b>                | DBU                             | 0      | DCM     | 100                  | -                                     | -                 |
| <b>3</b>                | KO <sup>t</sup> Bu              | rt     | THF     | 100                  | -                                     | -                 |
| <b>4</b>                | KF                              | 100    | Dioxane | 4                    | -                                     | -                 |
| <b>5</b>                | CsF                             | 100    | Dioxane | 100                  | 65                                    | 54:46             |
| <b>6</b>                | CsF                             | 70     | Dioxane | 100                  | 80                                    | 50:50             |
| <b>7</b>                | CsF                             | 50     | Dioxane | 100                  | -                                     | -                 |
| <b>8</b>                | Na <sub>2</sub> CO <sub>3</sub> | 70     | Dioxane | 17                   | -                                     | -                 |
| <b>9</b>                | K <sub>2</sub> CO <sub>3</sub>  | 70     | Dioxane | 88                   | -                                     | -                 |
| <b>10</b>               | Cs <sub>2</sub> CO <sub>3</sub> | 70     | Dioxane | 100                  | 55                                    | 61:39             |
| <b>11</b>               | Na <sub>3</sub> PO <sub>4</sub> | 70     | Dioxane | 17                   | -                                     | -                 |
| <b>12</b>               | NaO <sup>t</sup> Bu             | 70     | Dioxane | 100                  | -                                     | -                 |
| <b>13</b>               | Et <sub>3</sub> N or DIPEA      | 70     | Dioxane | <10                  | -                                     | -                 |
| <b>14</b>               | KOAc                            | 70     | Dioxane | 42                   | -                                     | -                 |
| <b>15<sup>[e]</sup></b> | TBAF                            | 70     | Dioxane | 100                  | 32                                    | 80:20             |
| <b>16</b>               | TBAF                            | 50     | Dioxane | 100                  | 70                                    | 83:17             |
| <b>17<sup>[f]</sup></b> | TBAF                            | 50     | Toluene | 100                  | 35                                    | 89:11             |
| <b>18</b>               | TBAF                            | 50     | THF     | 100                  | -                                     | -                 |

[a] Reactions run on a 0.1 mmol scale and all yield values refer to isolated products. [b] Conversion was determined by <sup>1</sup>H NMR. [c] Yield of isolated product [d]Diastereomeric ratio determined by <sup>1</sup>H NMR of reaction crude [e] Product **19** was observed (yield: 23%, dr; >99:1) [f] Product **19** was observed (yield: 20%, dr; >99:1).

## 7. Product characterization

### Diethyl (2*R*\*,3*S*\*)-3-(dichloromethyl)-2-(2,2-dichlorovinyl)pentanedioate (**2**)

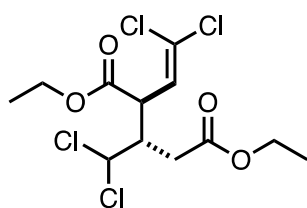

Synthesized from **1** according to general procedure B. Yellow oil obtained in 60% yield with >95:5 dr after column chromatography (DCM/hexane, 80:20).

**<sup>1</sup>H NMR** (500 MHz, CDCl<sub>3</sub>) δ 6.02 (d, *J* = 3.0 Hz, 1H), 5.87 (d, *J* = 10.6 Hz, 1H), 4.24 – 4.15 (m, 4H), 3.75 (dd, *J* = 10.5, 8.9 Hz, 1H), 3.26 (dddd, *J* = 8.9, 7.7, 4.1, 2.9 Hz, 1H), 2.85 (dd, *J* = 17.2, 4.1 Hz, 1H), 2.46 (dd, *J* = 17.2, 7.7 Hz, 1H), 1.31 (m, 6H) ppm. **<sup>13</sup>C NMR** (500 MHz, CDCl<sub>3</sub>) δ 171.4 (C), 169.9 (C), 125.9 (C), 124.2 (CH), 74.4 (CH), 61.9 (CH<sub>2</sub>), 61.2 (CH<sub>2</sub>), 48.6 (CH), 46.7 (CH), 32.3 (CH<sub>2</sub>), 14.1 (CH<sub>3</sub>), 14.0 (CH<sub>3</sub>) ppm. **HRMS (APCI)** Calc. for C<sub>12</sub>H<sub>16</sub>Cl<sub>4</sub>O<sub>4</sub> [M+H<sup>+</sup>]: 364.9875, found: 364.9874.

### Diethyl 2-(2-chlorovinyl)-3-(dichloromethyl)pentanedioate (**3-Z** and **3-E**)

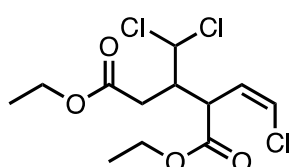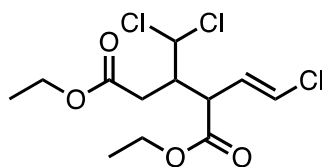

Obtained as a side product in the synthesis of **2** when reaction was carried out using DCM as solvent. Yellow oil obtained in 15% yield as a 1:1 mixture of *Z/E* isomers

after column chromatography (DCM/hexane, 75:25).

**<sup>1</sup>H NMR** (300 MHz, CDCl<sub>3</sub>) δ 6.21 (d, *J* = 7.3 Hz, 1H **3-Z**), 6.17 (d, *J* = 13.2 Hz, 1H **3-E**), 5.96 (d, *J* = 3.0 Hz, 1H **3-Z**), 5.88 (d, *J* = 3.3 Hz, 1H **3-E**), 5.80 – 5.70 (m, 1H **3-Z** + 1H **3-E**), 4.13 – 4.08 (m, 4H **3-Z** + 4H **3-E**), 3.91 (dd, *J* = 9.6 Hz, 1H **3-E**), 3.25 (m, 2H **3-Z** + 1H **3-E**), 2.78 – 2.72 (m, 1H **3-Z** + 1H **3-E**), 2.42 – 2.32 (m, 1H **3-Z** + 1H **3-E**), 1.24 – 1.19 (m, 6H **3-Z** + 6H **3-E**) ppm. **<sup>13</sup>C NMR** (500 MHz, CDCl<sub>3</sub>) δ 170.7 (C **3-Z**), 170.3 (C **3-E**), 169.8 (C **3-Z**), 169.6 (C **3-E**), 126.7 (CH **3-Z**), 125.2 (CH **3-E**), 122.2 (CH **3-Z**), 122.1 (CH **3-E**), 73.7 (CH **3-Z**), 73.6 (CH **3-E**), 60.8 (CH<sub>2</sub> **3-Z**), 60.7 (CH<sub>2</sub> **3-E**), 60.2 (CH<sub>2</sub> **3-Z**), 60.0 (CH<sub>2</sub> **3-E**), 49.2 (CH **3-Z**), 45.6 (CH **3-E**), 45.4 (CH **3-Z**), 45.1 (CH **3-E**), 31.7 (CH<sub>2</sub> **3-Z**), 31.3 (CH<sub>2</sub> **3-E**), 13.0 (2xCH<sub>3</sub> **3-Z** + 2xCH<sub>3</sub> **3-E**) ppm. **HRMS (APCI)** Calc. for C<sub>12</sub>H<sub>17</sub>Cl<sub>3</sub>O<sub>4</sub> [M+H<sup>+</sup>]: 331.0265, found: 331.0267.

### Di-*tert*-butyl (2*R*\*,3*S*\*)-3-(dichloromethyl)-2-(2,2-dichlorovinyl)pentanedioate (**8**)

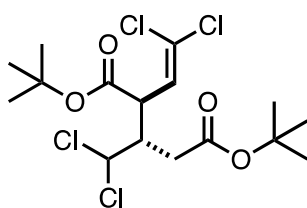

Synthesized from **4** according to general procedure B. Yellow oil obtained in 57% yield with >95:5 dr after column chromatography (DCM/hexane, 80:20).

**<sup>1</sup>H NMR** (300 MHz, CDCl<sub>3</sub>) δ 6.03 (d, *J* = 2.7 Hz, 1H), 5.88 (d, *J* = 10.4 Hz, 1H), 3.64 (dd, *J* = 10.7, 8.7 Hz, 1H), 3.26 – 3.14 (m, 1H), 2.77 (dd, *J* = 16.7, 3.6 Hz, 1H), 2.35 (dd, *J* = 17.4, 7.0 Hz, 1H), 1.49 (s, 18H) ppm. **<sup>13</sup>C NMR** (300 MHz, CDCl<sub>3</sub>) δ 170.6 (C), 169.1 (C), 125.0 (C), 124.7 (CH), 82.8 (C), 81.5 (C), 74.7 (CH), 49.9 (CH), 46.5 (CH), 33.5 (CH<sub>2</sub>), 28.1 (3xCH<sub>3</sub>), 27.9 (3xCH<sub>3</sub>) ppm. **HRMS (APCI)** Calc. for C<sub>16</sub>H<sub>24</sub>Cl<sub>4</sub>O<sub>4</sub> [M+H<sup>+</sup>]: 421.0501, found: 421.0506.

**(2*R*\*,3*S*\*)-3-(Dichloromethyl)-2-(2,2-dichlorovinyl)-*N*<sup>1</sup>,*N*<sup>5</sup>-dimethoxy-*N*<sup>1</sup>,*N*<sup>5</sup>-dimethylpentanediamide (9)**

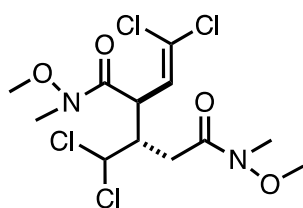

Synthesized from **5** according to general procedure B. Yellow oil obtained in 51% yield with >95:5 dr after column chromatography (AcOEt/hexane, 60:40).

<sup>1</sup>H NMR (300 MHz, CDCl<sub>3</sub>) δ 5.96 (d, *J* = 2.9 Hz, 1H), 5.80 (d, *J* = 10.7 Hz, 1H), 4.11 (t<sub>ap</sub>, *J* = 10.2 Hz, 1H), 3.68 (s, 6H), 3.50 (dd, *J* = 8.1, 3.7 Hz, 1H), 3.15 (s, 6H), 2.81 (m, 1H), 2.67 (dd, *J* = 17.2, 7.1 Hz, 1H) ppm. <sup>13</sup>C NMR (300MHz, CDCl<sub>3</sub>) δ 171.6 (C), 169.9 (C), 125.8 (CH), 124.2 (C), 75.6 (CH), 61.6 (CH<sub>3</sub>), 61.3 (CH<sub>3</sub>), 45.8 (CH), 45.1 (CH), 32.4 (CH<sub>3</sub>), 30.9 (CH<sub>3</sub>), 29.3 (CH<sub>2</sub>) ppm. HRMS (APCI) Calc. for C<sub>12</sub>H<sub>19</sub>Cl<sub>4</sub>N<sub>2</sub>O<sub>4</sub> [M+H<sup>+</sup>]: 395.0093, found: 329.0094.

**Ethyl (1*R*\*,2*R*\*,3*S*\*)-2-chloro-1-(2,2-dichlorovinyl)-3-(2-ethoxy-2-oxoethyl) cyclopropane-1-carboxylate (16)**

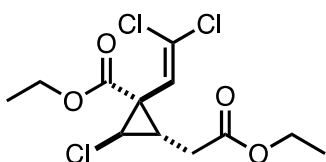

Synthesized from **2** according to general procedure C. Yellow oil obtained in 70% yield with 83:17 dr after column chromatography (DCM/hexane, 80:20).

<sup>1</sup>H NMR (500 MHz, CDCl<sub>3</sub>) δ 5.94 (s, 1H), 4.24 – 4.04 (m, 4H), 3.71 (d, *J* = 5.8 Hz, 1H), 2.72 (dd, *J* = 16.8, 7.8 Hz, 1H), 2.58 (dd, *J* = 16.8, 7.0 Hz, 1H), 1.82 (dd, *J* = 7.4, 5.8, 1H) Hz, 1.20 (m, 6H) ppm. <sup>13</sup>C NMR (500 MHz, CDCl<sub>3</sub>) δ 169.9 (C), 167.0 (C), 128.5 (C), 123.2 (CH), 60.1 (CH<sub>2</sub>), 59.8 (CH<sub>2</sub>), 42.7 (CH), 34.2 (CH), 33.0 (C), 30.3 (CH<sub>2</sub>), 13.1 (2xCH<sub>3</sub>) ppm. HRMS (APCI) Calc. for C<sub>12</sub>H<sub>15</sub>Cl<sub>3</sub>O<sub>4</sub> [M+H<sup>+</sup>]: 329. 0109, found: 329.0113.

***tert*-Butyl (1*R*\*,2*R*\*,3*S*\*)-2-(2-(*tert*-butoxy)-2-oxoethyl)-3-chloro-1-(2,2-dichlorovinyl) cyclopropane-1-carboxylate (17)**

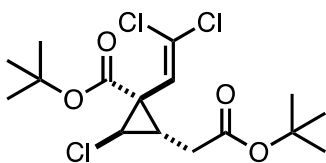

Synthesized from **8** according to general procedure B. Yellow oil obtained in 61% yield with 81:19 dr after column chromatography (DCM/hexane, 80:20).

<sup>1</sup>H NMR (300 MHz, CDCl<sub>3</sub>) δ 6.00 (s, 1H), 3.74 (d, *J* = 5.8 Hz, 1H), 2.69 (dd, *J* = 17.0, 7.9 Hz, 1H), 2.57 (dd, *J* = 17.0, 6.9 Hz, 1H), 1.83 (dd, 6.9 Hz, 5.8 Hz, 1H), 1.48 (s, 18H) ppm. <sup>13</sup>C NMR (300 MHz, CDCl<sub>3</sub>) δ 169.3 (C), 165.9 (C), 127.7 (C), 123.5 (CH), 81.7 (C), 80.2 (C), 42.3 (CH), 34.2 (CH), 33.8 (CH), 31.3 (CH<sub>2</sub>), 27.1 (3xCH<sub>3</sub>), 26.9 (3xCH<sub>3</sub>) ppm. HRMS (APCI) Calc. for C<sub>16</sub>H<sub>23</sub>Cl<sub>3</sub>O<sub>4</sub> [M+H<sup>+</sup>-C<sub>8</sub>H<sub>18</sub>O]: 254.9372, found: 254.9377.

**Diethyl (*E*)-2-(2,2-dichloroethylidene)-3-(dichloromethyl)pentanedioate (19)**

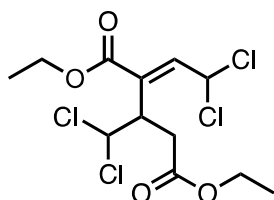

Obtained as a side product in the synthesis of **16** when reaction was carried out at 70 °C. Yellow oil obtained in 23% yield with >99:1 dr after column chromatography (DCM/hexane, 70:30).

**<sup>1</sup>H NMR** (300 MHz, CDCl<sub>3</sub>) δ 6.99 (d, *J* = 10.0 Hz, 1H), 6.70 (d, *J* = 9.9 Hz, 1H), 6.13 (d, *J* = 9.8 Hz, 1H), 4.25 – 3.99 (m, 4H), 3.57 (td, *J* = 10.0, 3.6 Hz, 1H), 2.94 (dd, *J* = 16.4, 3.6 Hz, 1H), 2.78 (dd, *J* = 16.4, 10.0 Hz, 1H), 1.28 (m, 6H) ppm. **<sup>13</sup>C NMR** (300MHz, CDCl<sub>3</sub>) δ 169.9 (C), 163.8 (C), 140.9 (C), 127.7 (CH), 72.4 (CH), 64.2 (CH), 60.9 (CH<sub>2</sub>), 60.3 (CH<sub>2</sub>), 46.9 (CH), 34.9 (CH<sub>2</sub>), 13.4 (2XCH<sub>3</sub>) ppm. **HRMS (APCI)** Calc. for C<sub>12</sub>H<sub>16</sub>Cl<sub>4</sub>O<sub>4</sub> [M+H<sup>+</sup>]: 364.9878, found: 364.9879.

**(1*R*\*,2*S*\*,3*R*\*)-2-Chloro-3-((*R*\*)-4,4-dichloro-1-(methoxy(methyl)amino)-1-oxobut-3-en-2-yl)-*N*-methoxy-*N*-methylcyclopropane-1-carboxamide (20)**

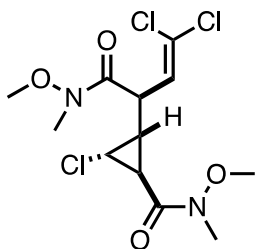

Synthesized from **5** or **9** according to either procedure D or E. Yellow oil obtained in 56% yield with >95:5 dr after column chromatography (AcOEt/hexane, 60:40).

**<sup>1</sup>H NMR** (300 MHz, CDCl<sub>3</sub>) δ 6.05 (d, *J* = 10.6 Hz, 1H), 4.04 (t<sub>ap</sub>, *J* = 10.2 Hz, 1H), 3.79 (s, 3H), 3.78 (s, 3H), 3.71 (dd, *J* = 7.6, 3.5 Hz, 1H), 3.25 (s, 3H), 3.24 (s, 3H), 2.45 (bs, 1H), 2.32 (ddd, *J* = 10.0, 7.6, 6.1 Hz, 1H) ppm. **<sup>13</sup>C NMR** (500 MHz, CDCl<sub>3</sub>) δ 169.4 (C), 169.1(C), 125.8 (C), 122.4 (CH), 74.0 (CH), 60.8 (CH<sub>3</sub>), 60.6 (CH<sub>3</sub>), 41.8 (CH), 38.2 (CH), 29.89 (2xCH<sub>3</sub>), 27.58 (CH) ppm. **HRMS (APCI)** Calc. for C<sub>12</sub>H<sub>17</sub>Cl<sub>3</sub>N<sub>2</sub>O<sub>4</sub> [M+H<sup>+</sup>]: 359.0332, found: 359.0336.

## 8. NMR spectra

<sup>1</sup>H NMR (CDCl<sub>3</sub>, 300MHz)

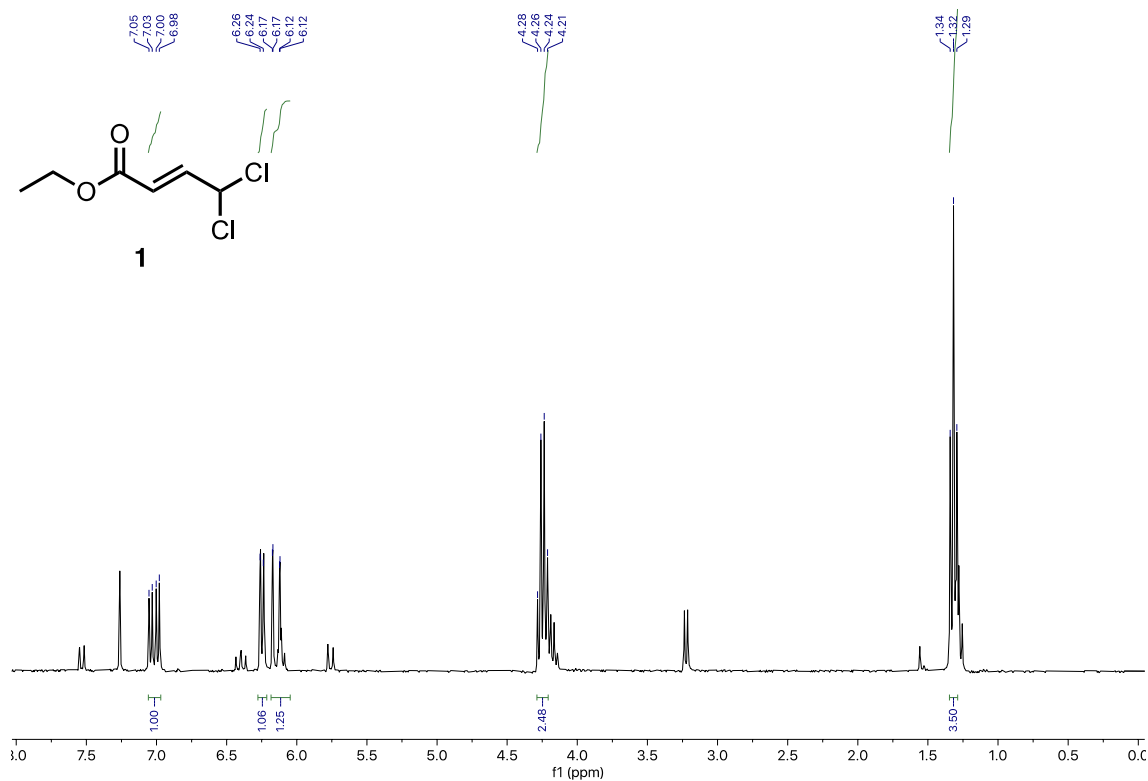

<sup>13</sup>C NMR (CDCl<sub>3</sub>, 300 MHz)

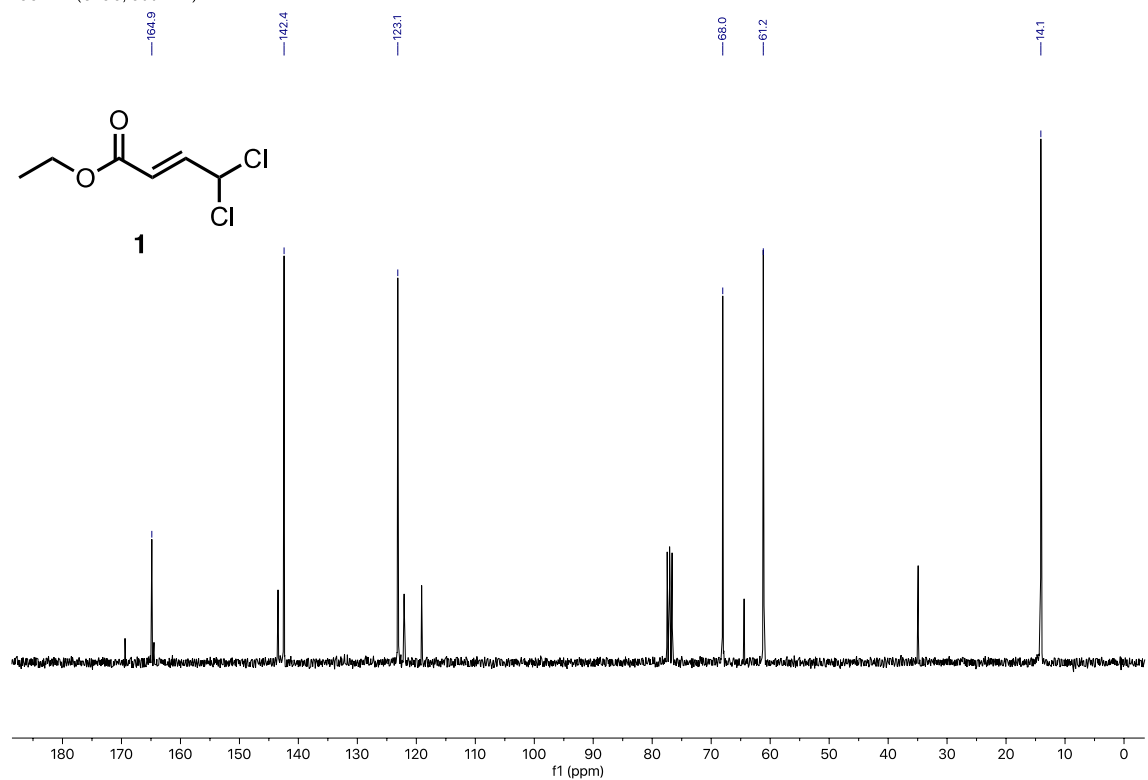

<sup>1</sup>H NMR (CDCl<sub>3</sub>, 300MHz)

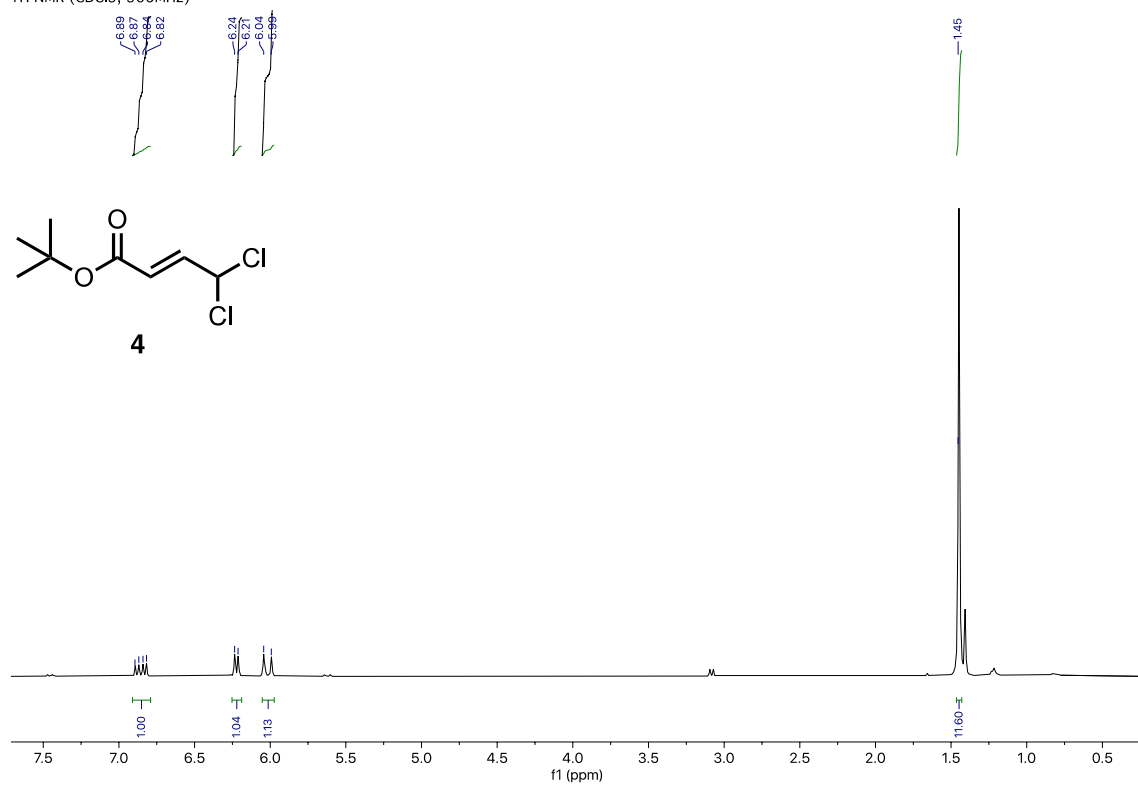

<sup>13</sup>C NMR (CDCl<sub>3</sub>, 300 MHz)

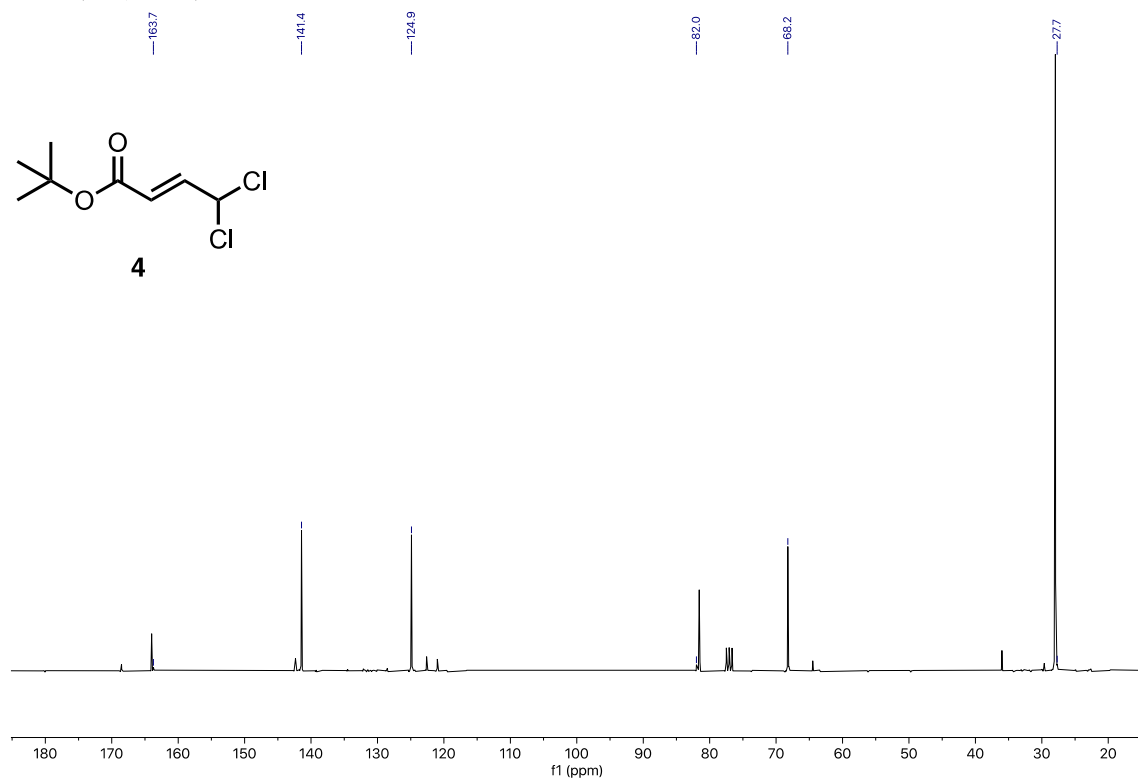

<sup>1</sup>H NMR (CDCl<sub>3</sub>, 300 MHz)

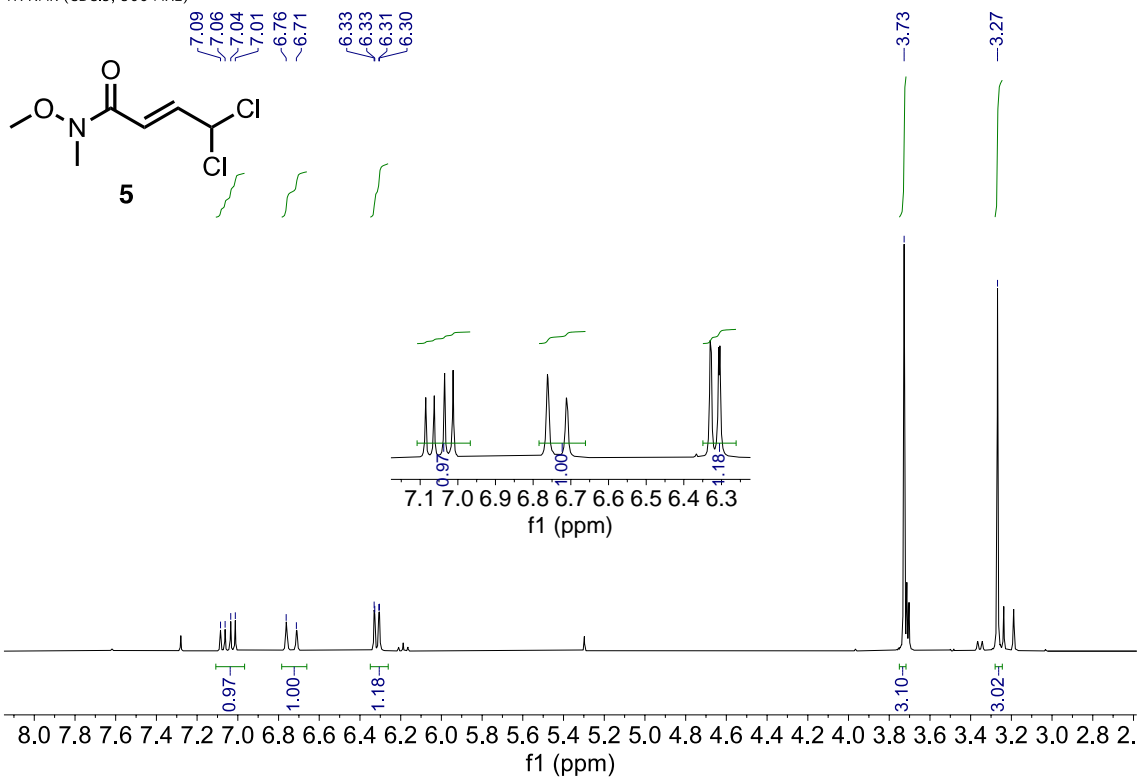

<sup>13</sup>C NMR (CDCl<sub>3</sub>, 300 MHz)

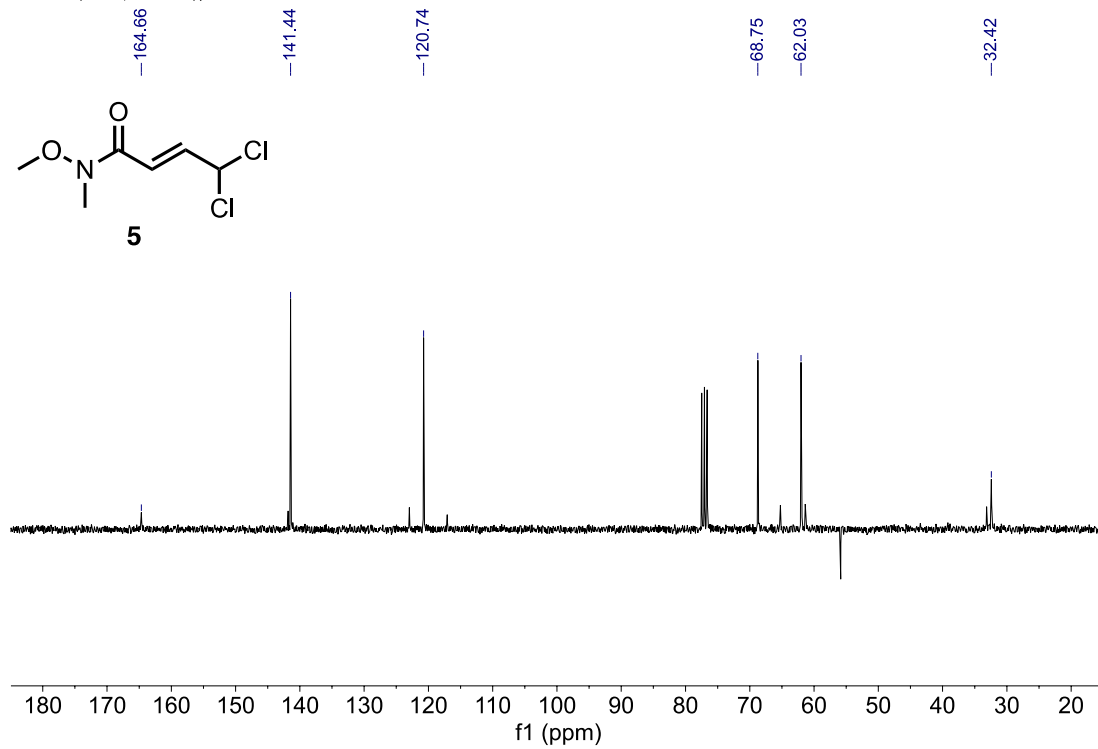

<sup>1</sup>H NMR (CDCl<sub>3</sub>, 300 MHz)

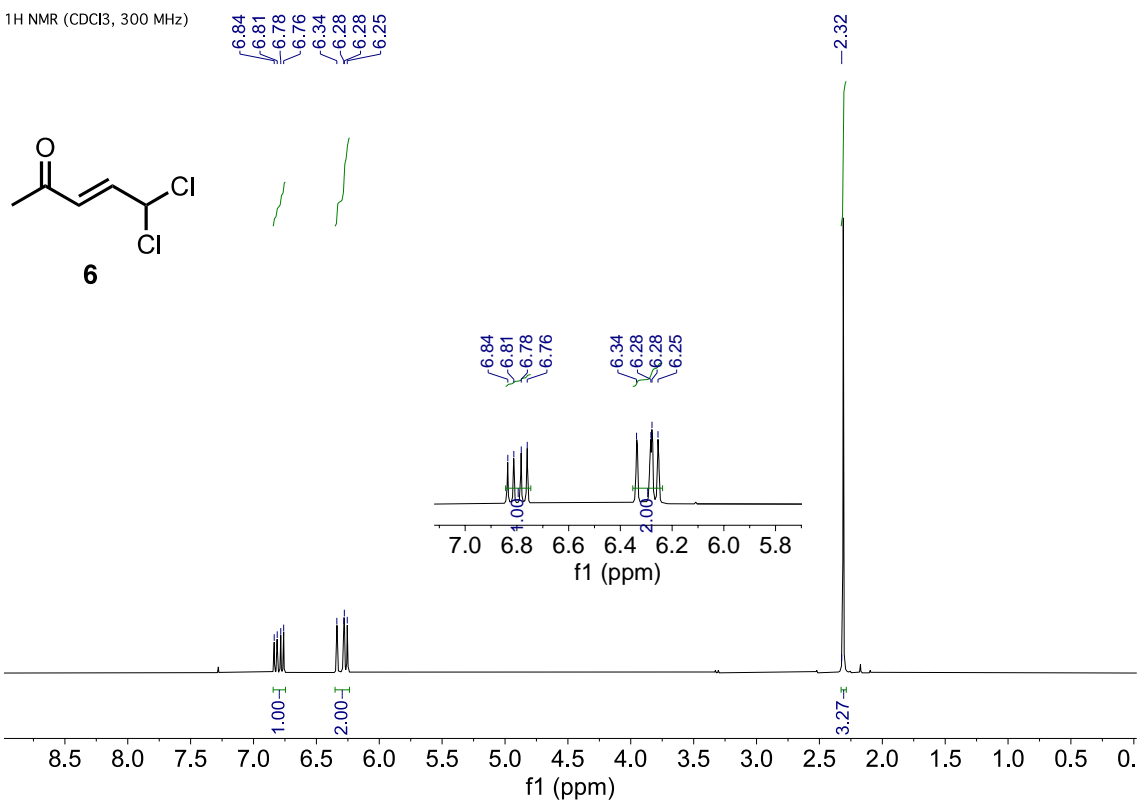

<sup>13</sup>C NMR (CDCl<sub>3</sub>, 300 MHz)

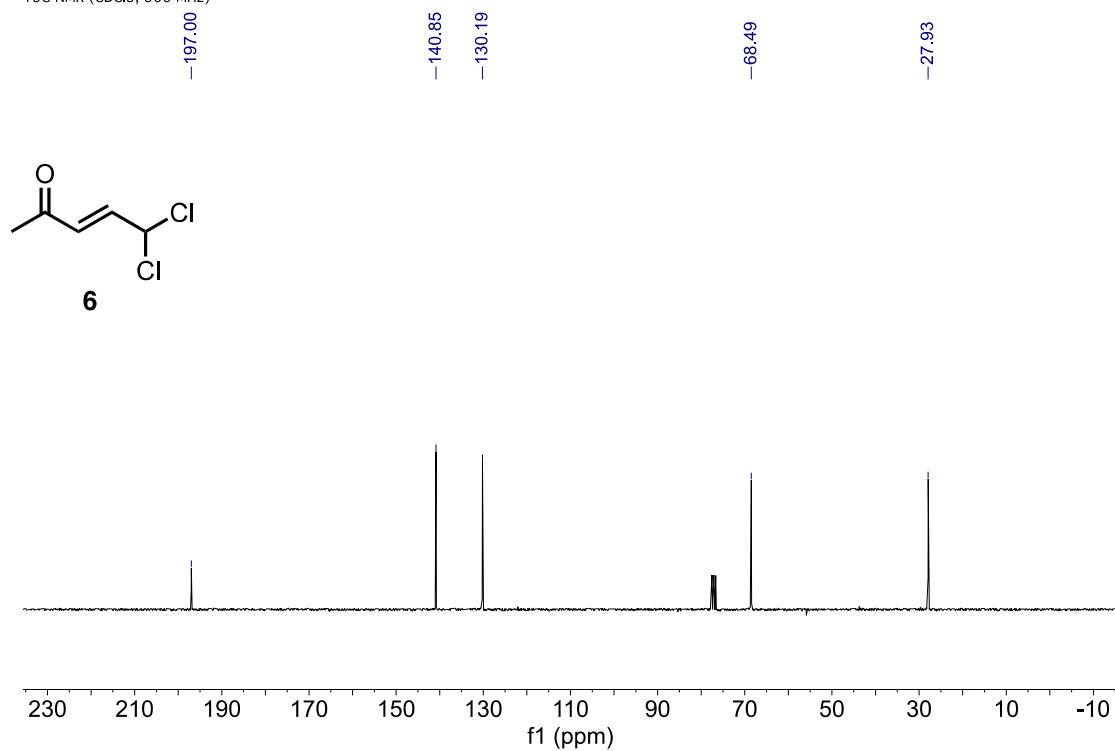



<sup>1</sup>H NMR (CDCl<sub>3</sub>, 300 MHz)

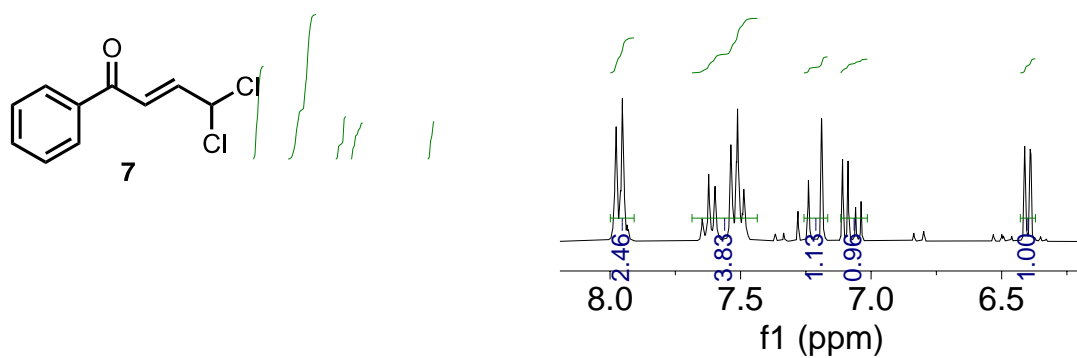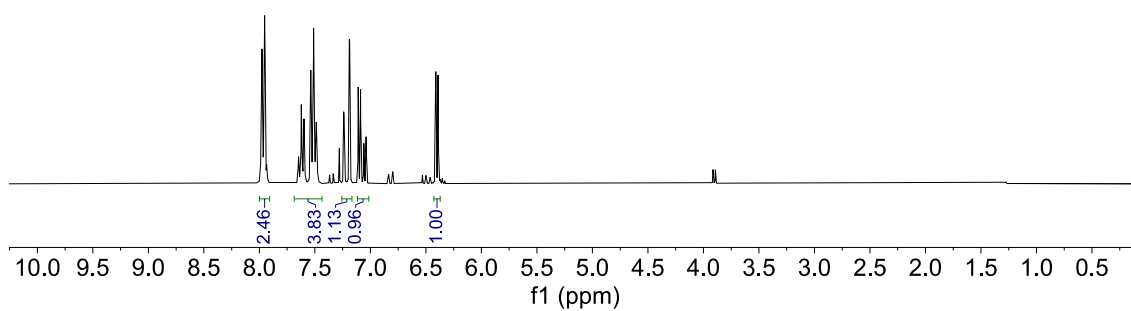

<sup>13</sup>C NMR (CDCl<sub>3</sub>, 300 MHz)

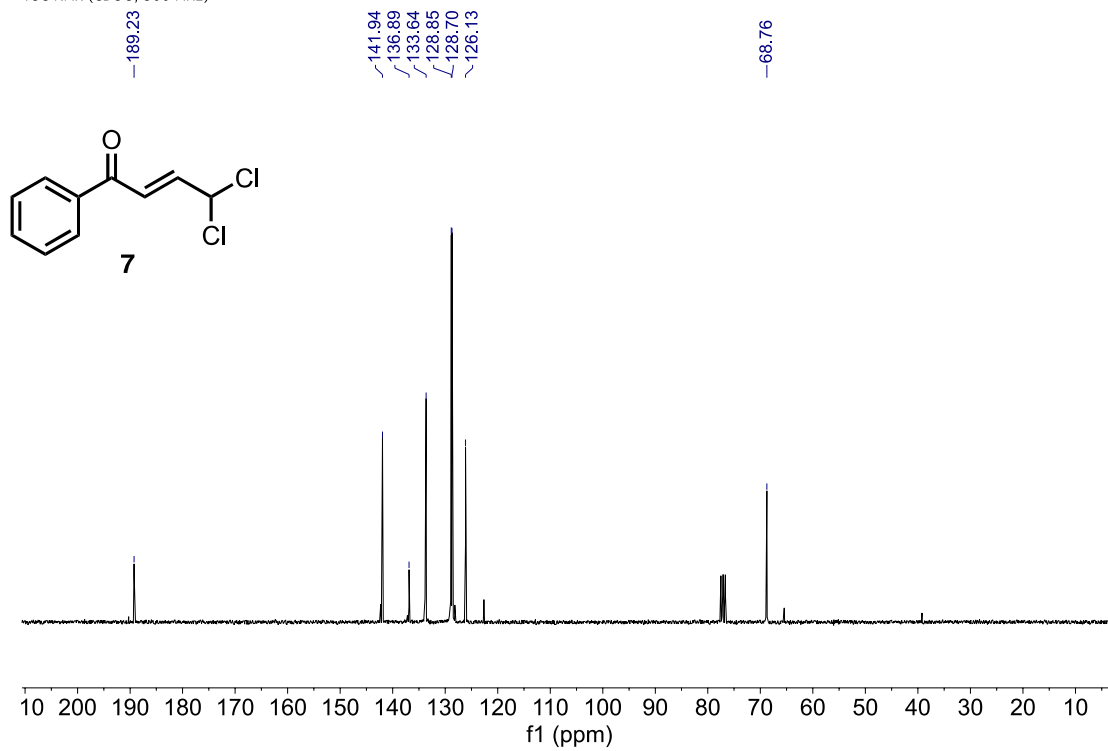

<sup>1</sup>H NMR (CDCl<sub>3</sub>, 500MHz)

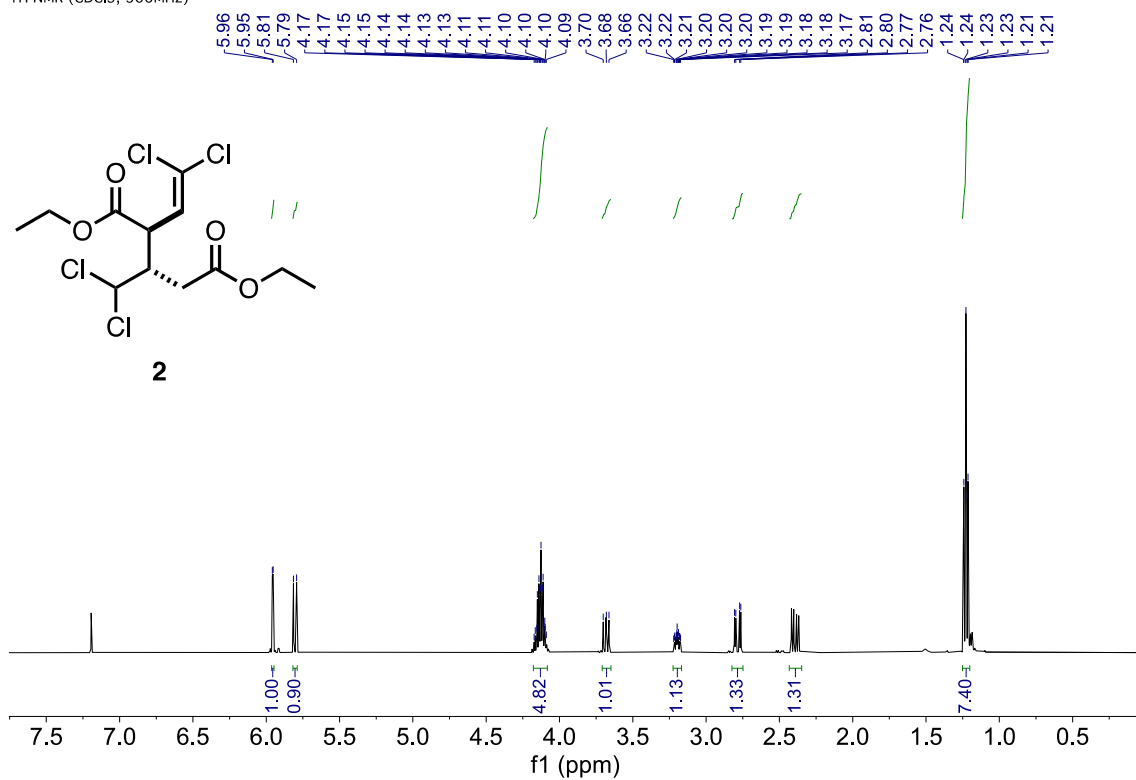

<sup>13</sup>C NMR (CDCl<sub>3</sub>, 500MHz)

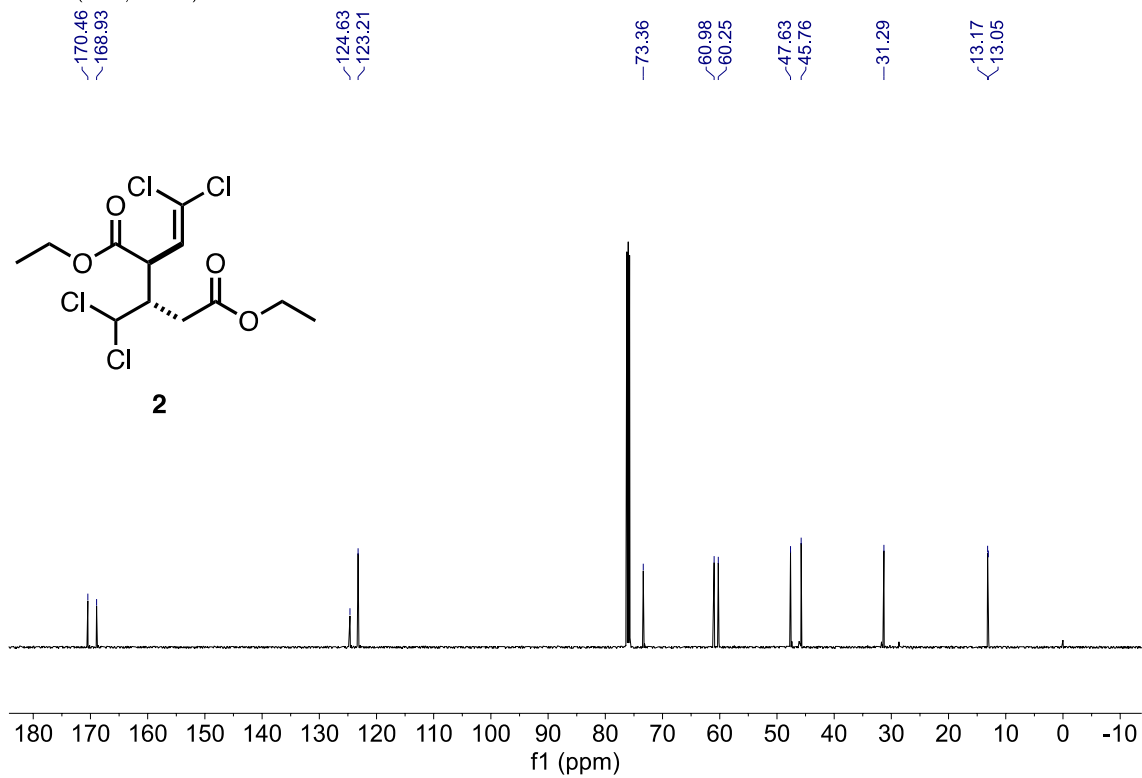

COSY

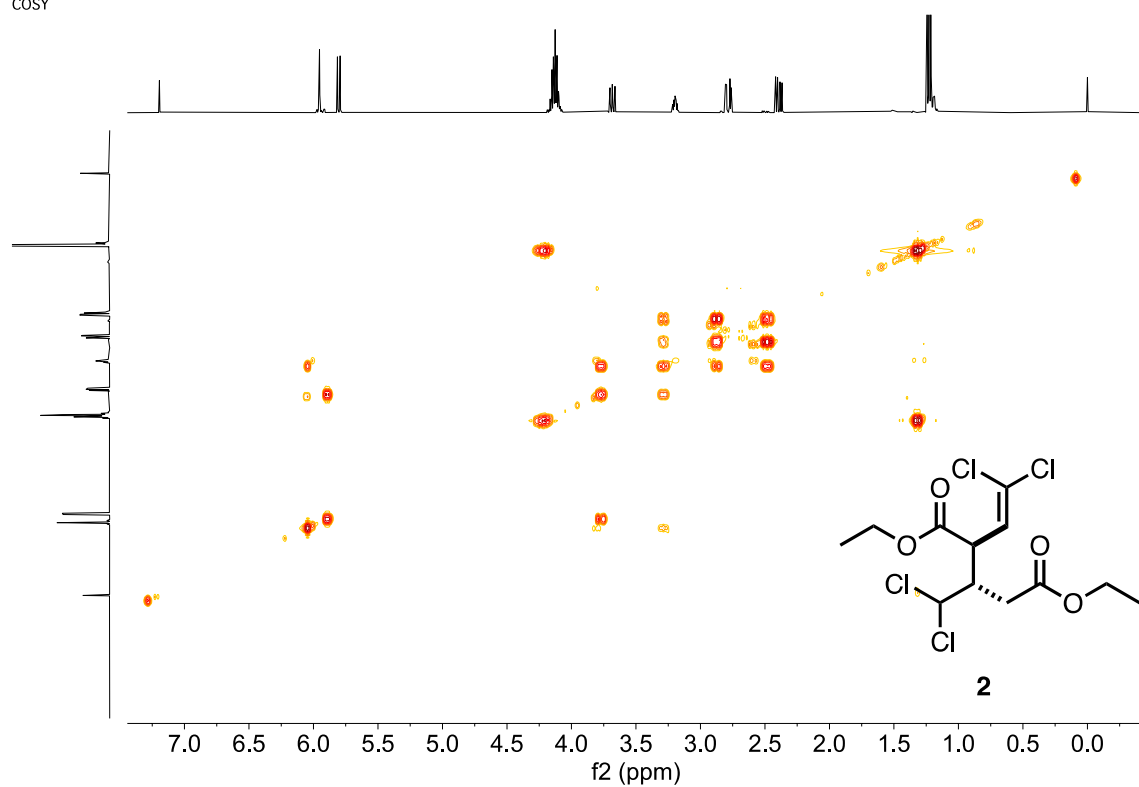

HSQC

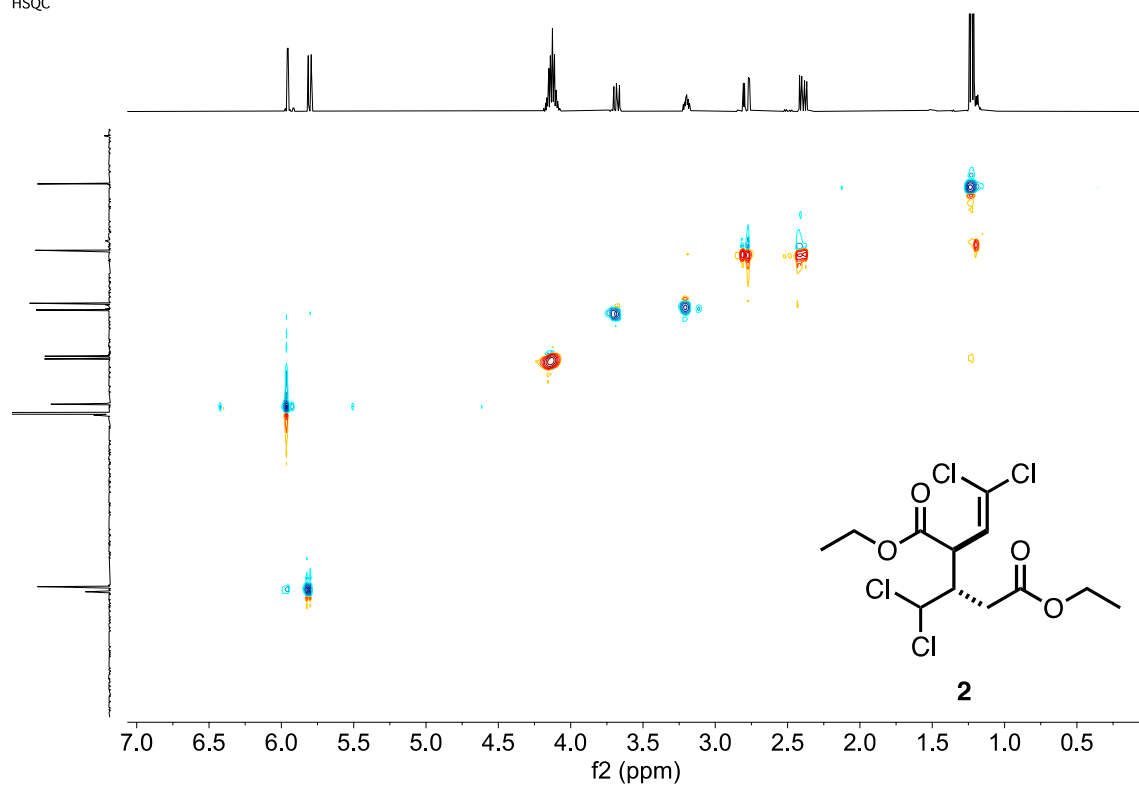

HMBC

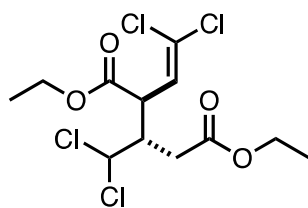

2

HMBC

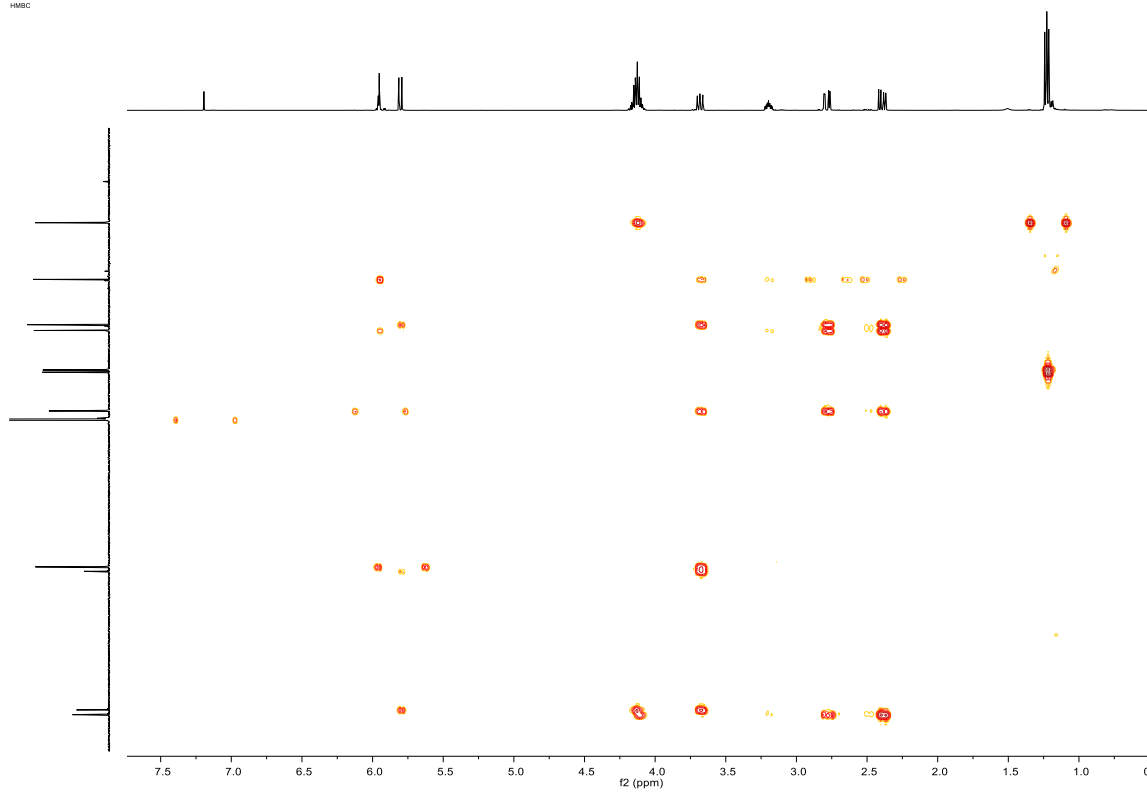

<sup>1</sup>H NMR (CDCl<sub>3</sub>, 300 MHz)

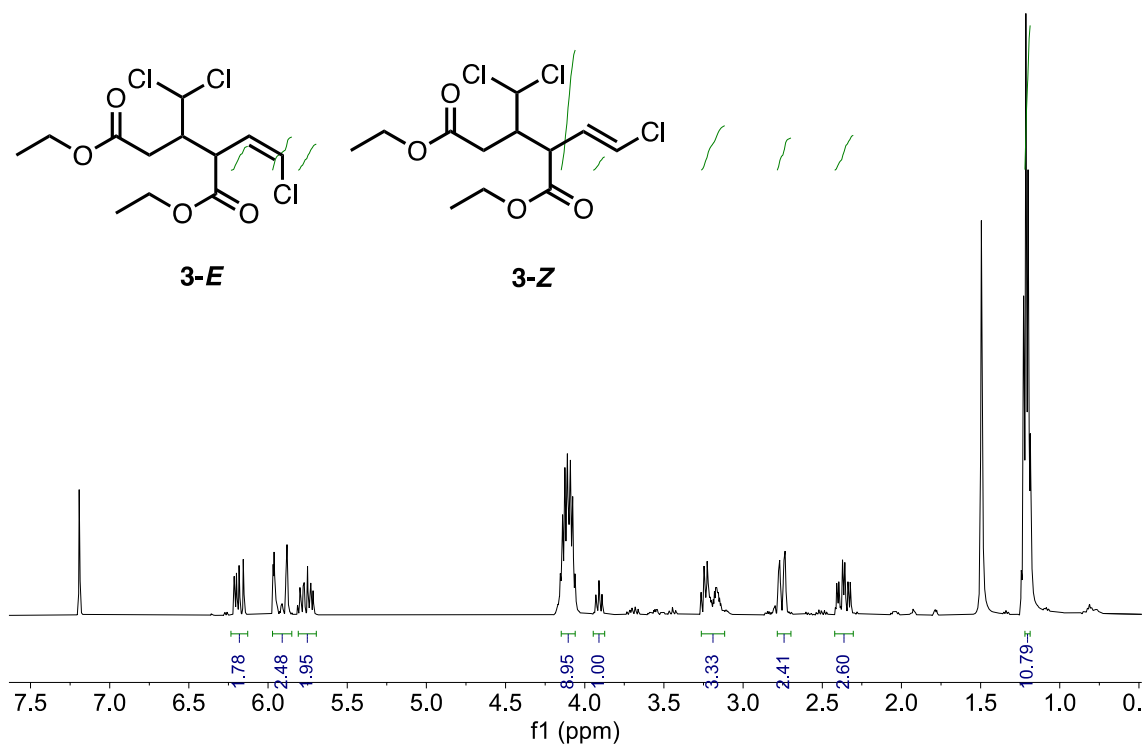

<sup>13</sup>C NMR (CDCl<sub>3</sub>, 500 MHz)

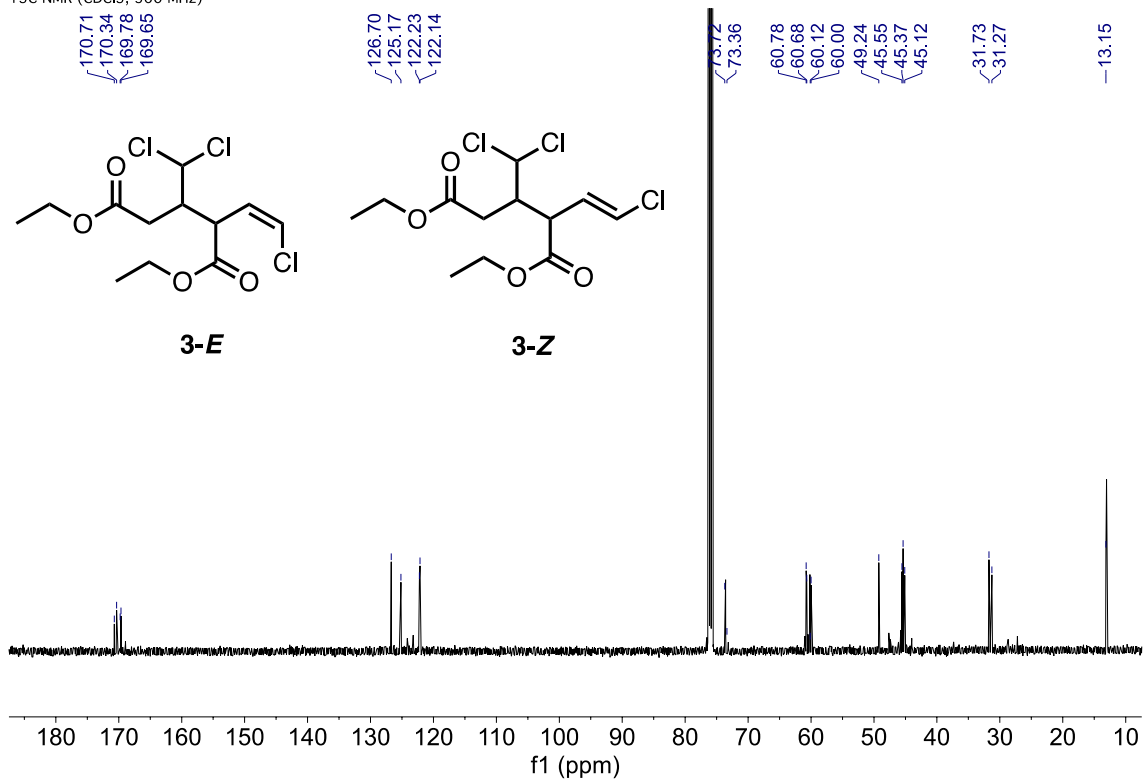

<sup>1</sup>H NMR (CDCl<sub>3</sub>, 300MHz)

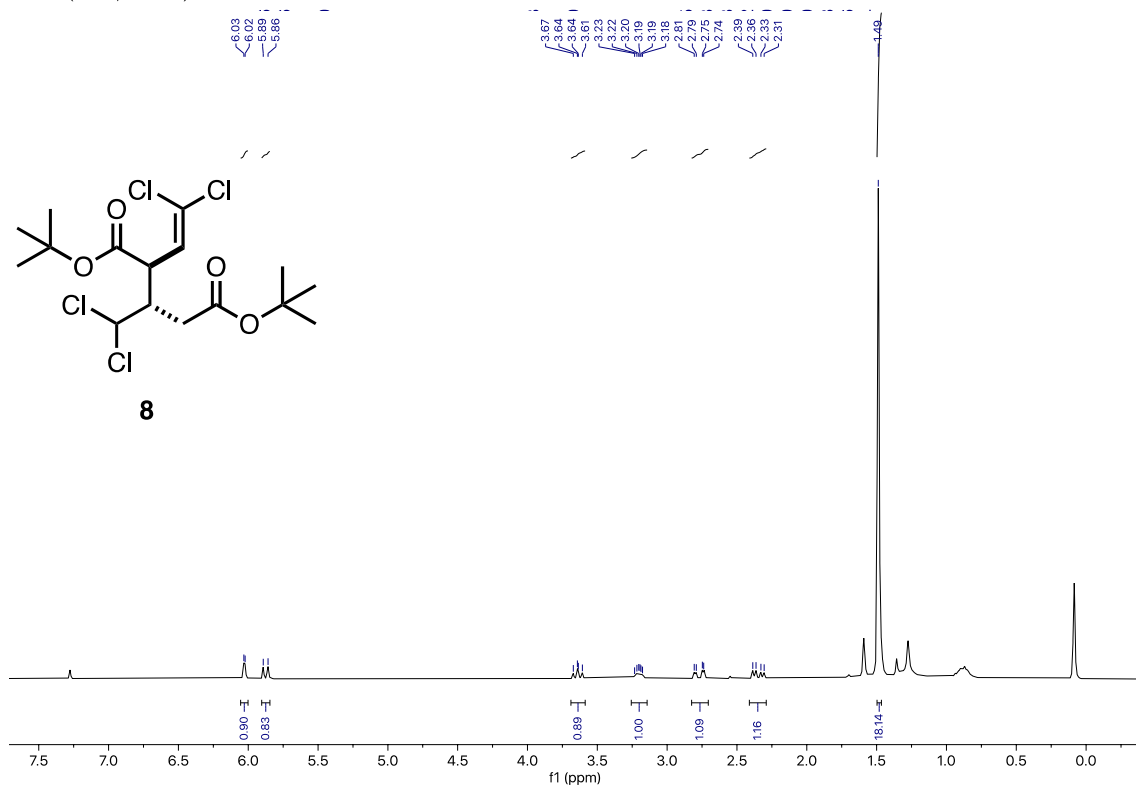

<sup>13</sup>C NMR (CDCl<sub>3</sub>, 300MHz)

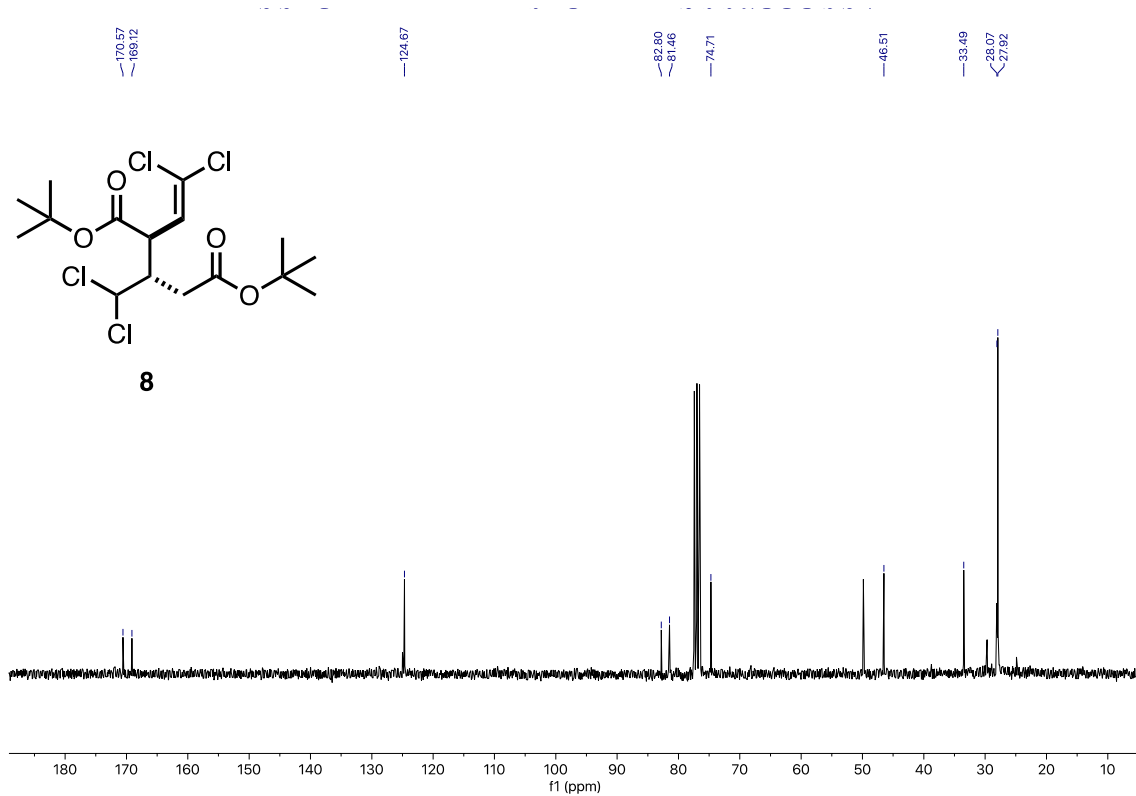

<sup>1</sup>H NMR (CDCl<sub>3</sub>, 300MHz)

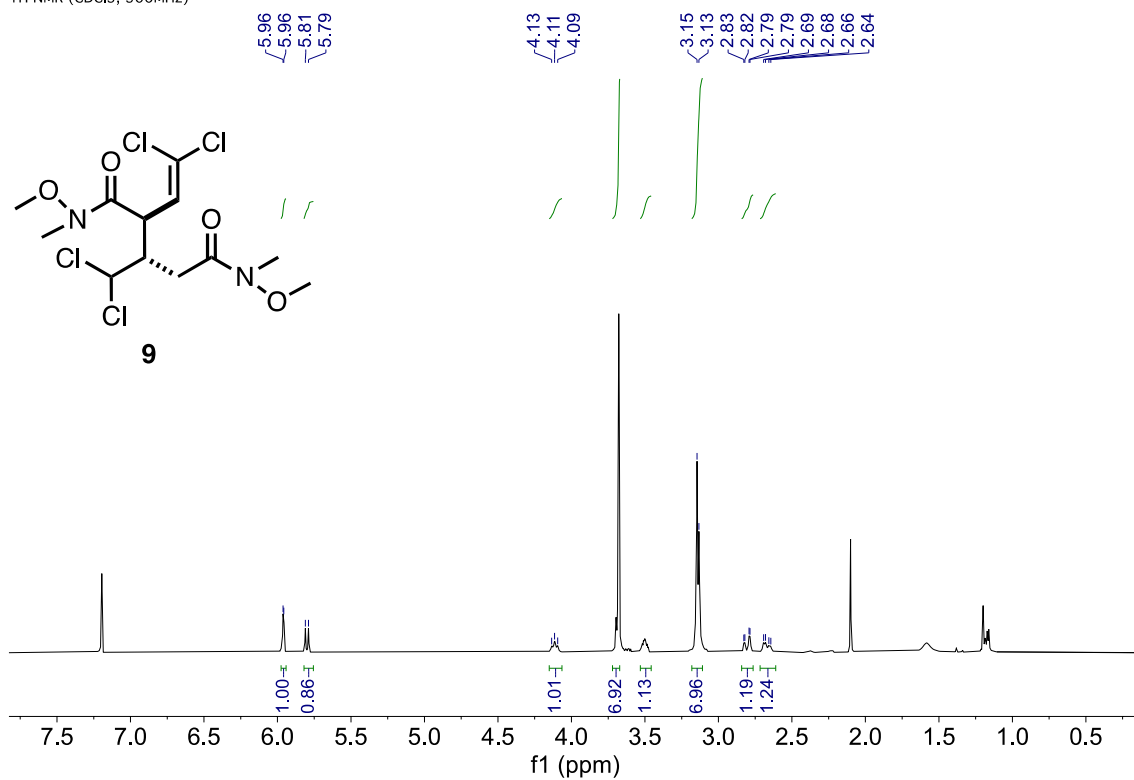

<sup>13</sup>C NMR (CDCl<sub>3</sub>, 500MHz)

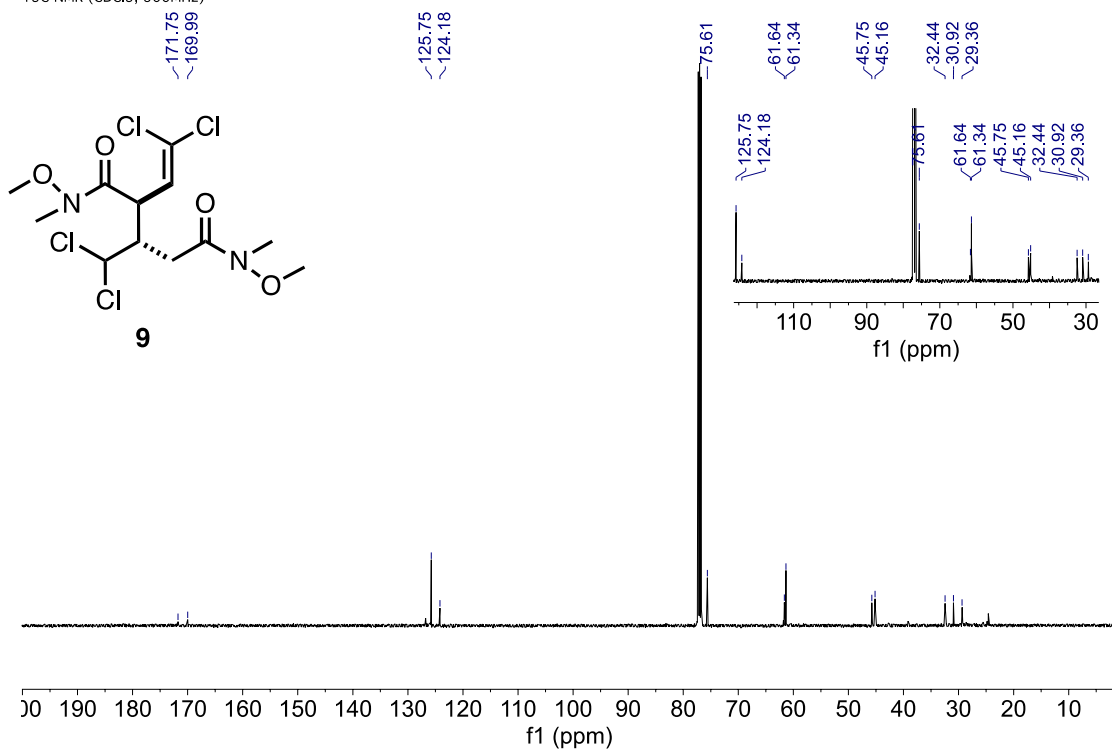

<sup>1</sup>H NMR (CDCl<sub>3</sub>, 500MHz)

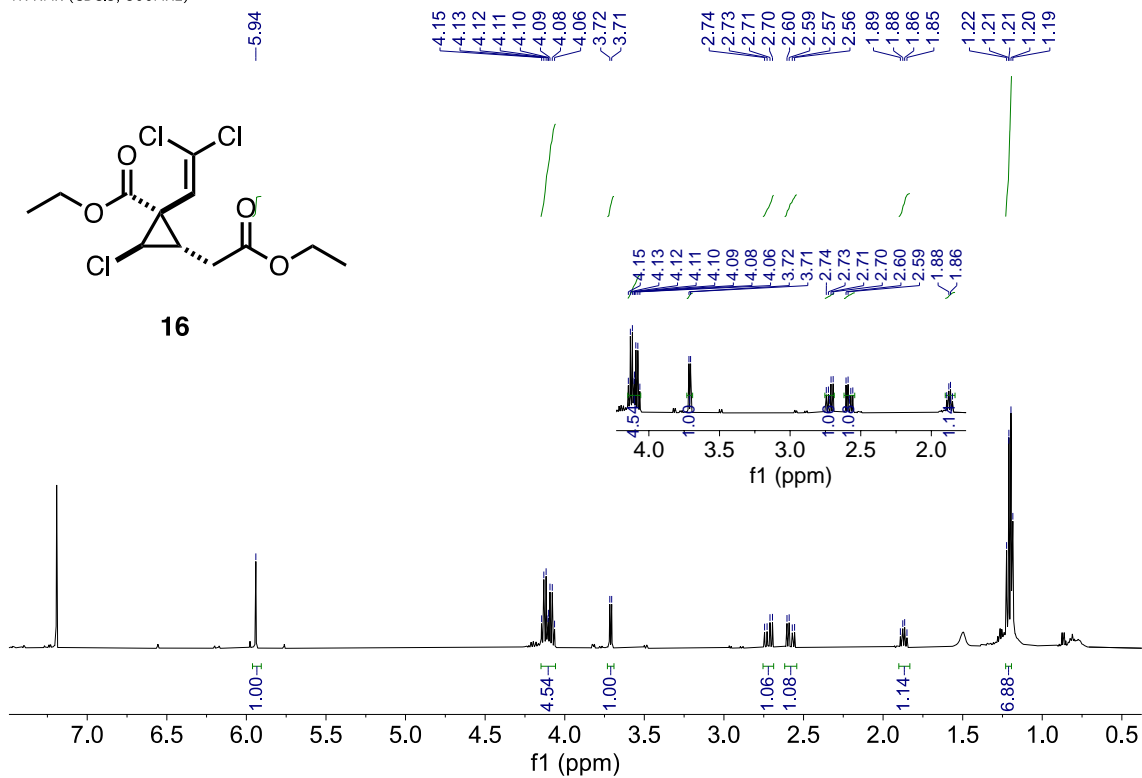

<sup>13</sup>C NMR (CDCl<sub>3</sub>, 500MHz)

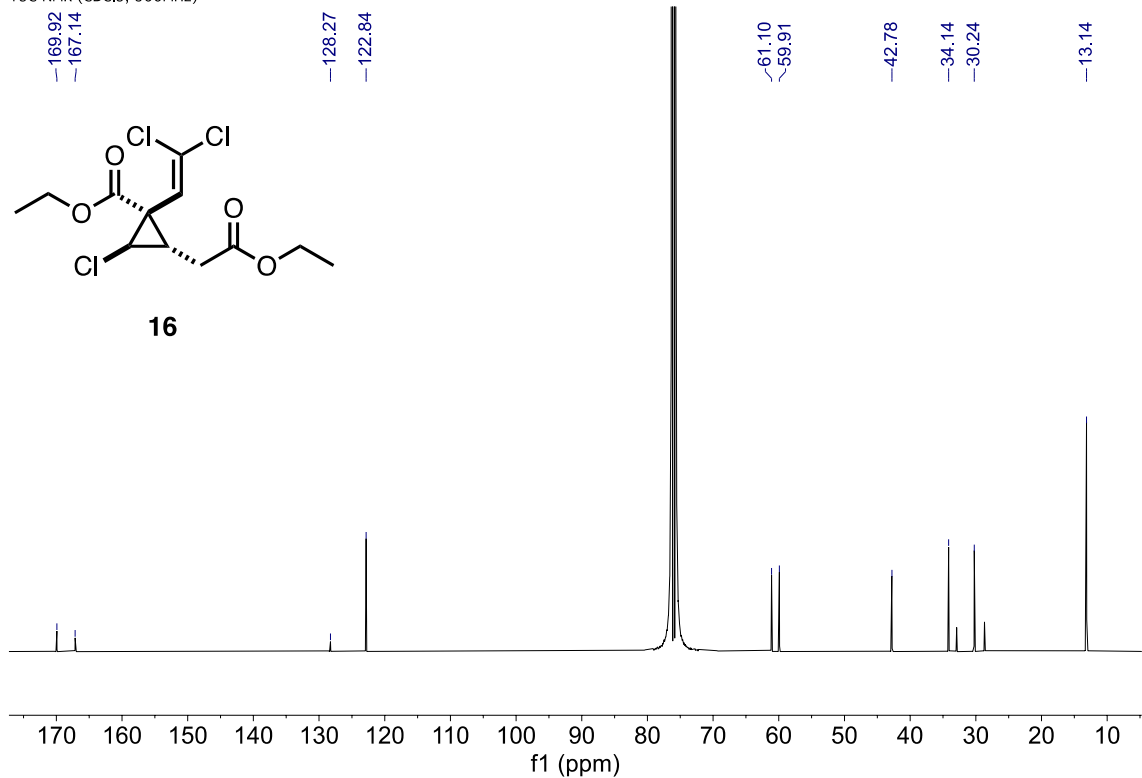



<sup>1</sup>H NMR (CDCl<sub>3</sub>, 300MHz)

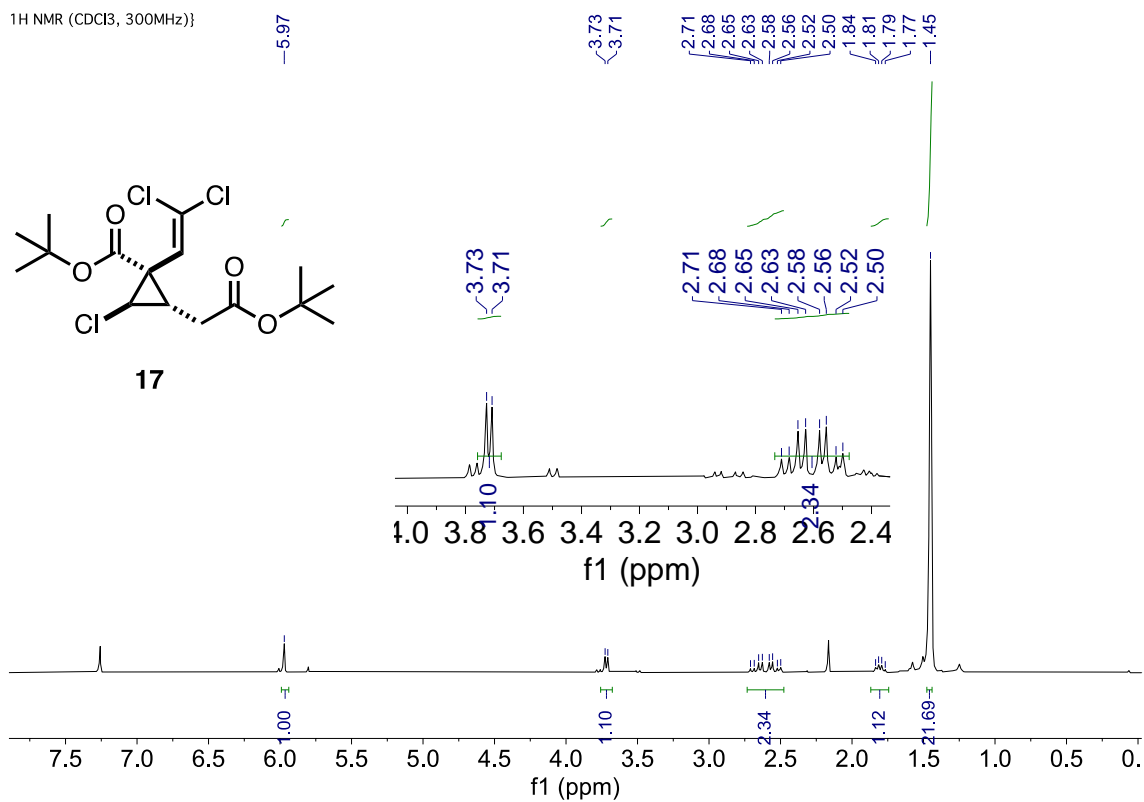

<sup>13</sup>C NMR (CDCl<sub>3</sub>, 300MHz)

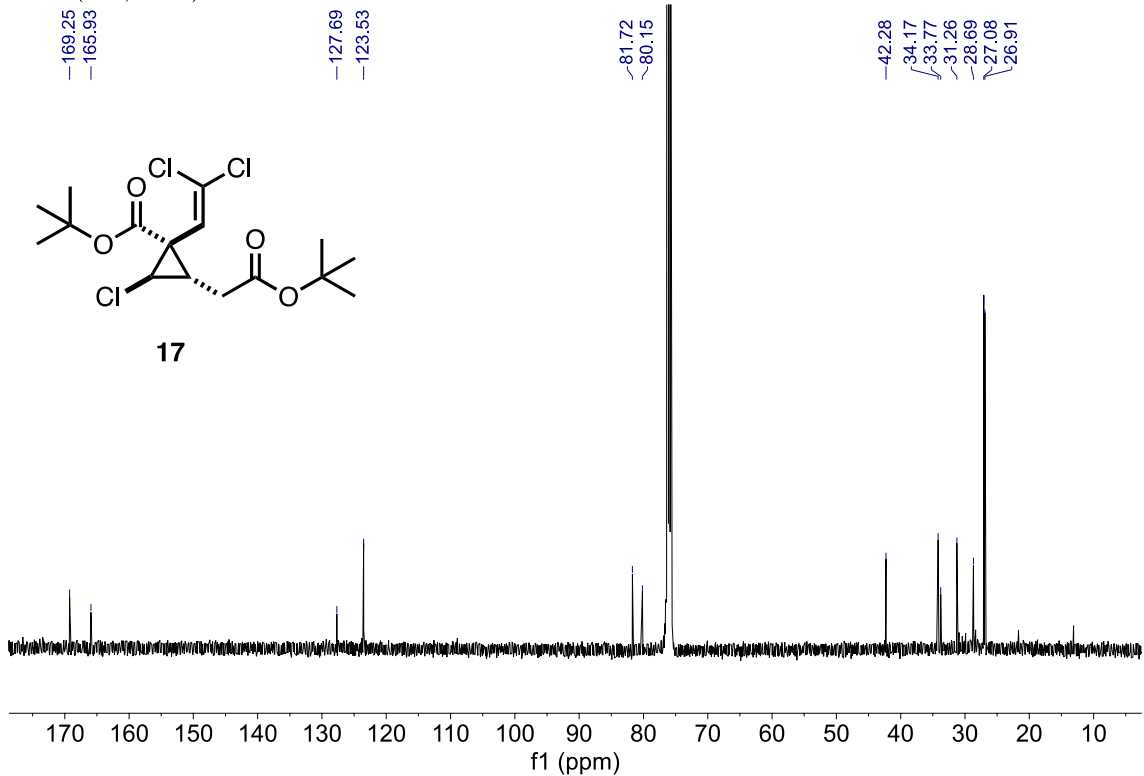

<sup>1</sup>H NMR (CDCl<sub>3</sub>, 300MHz)

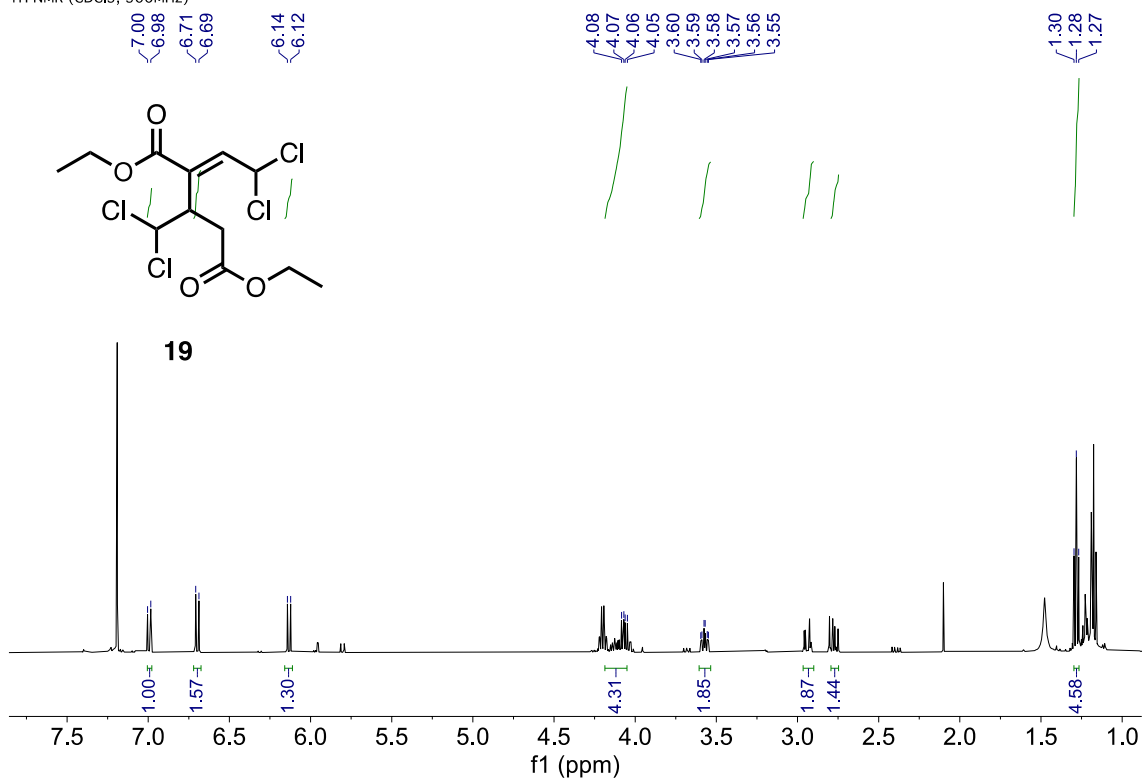

<sup>13</sup>C NMR (CDCl<sub>3</sub>, 300MHz)

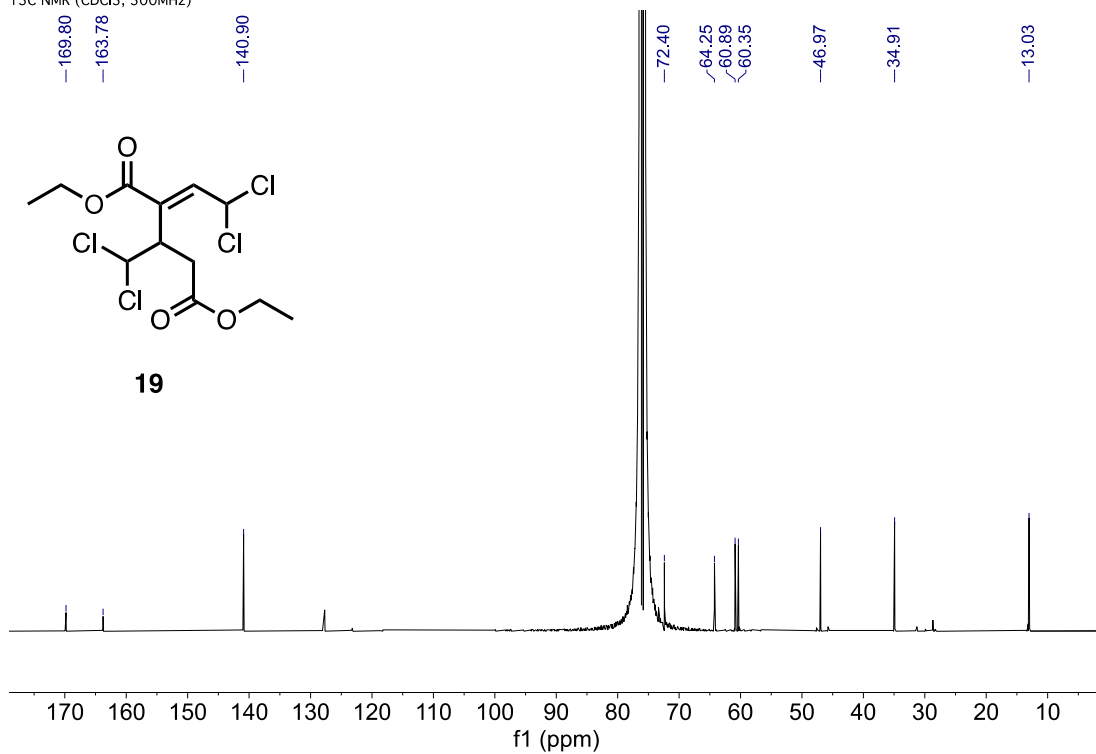

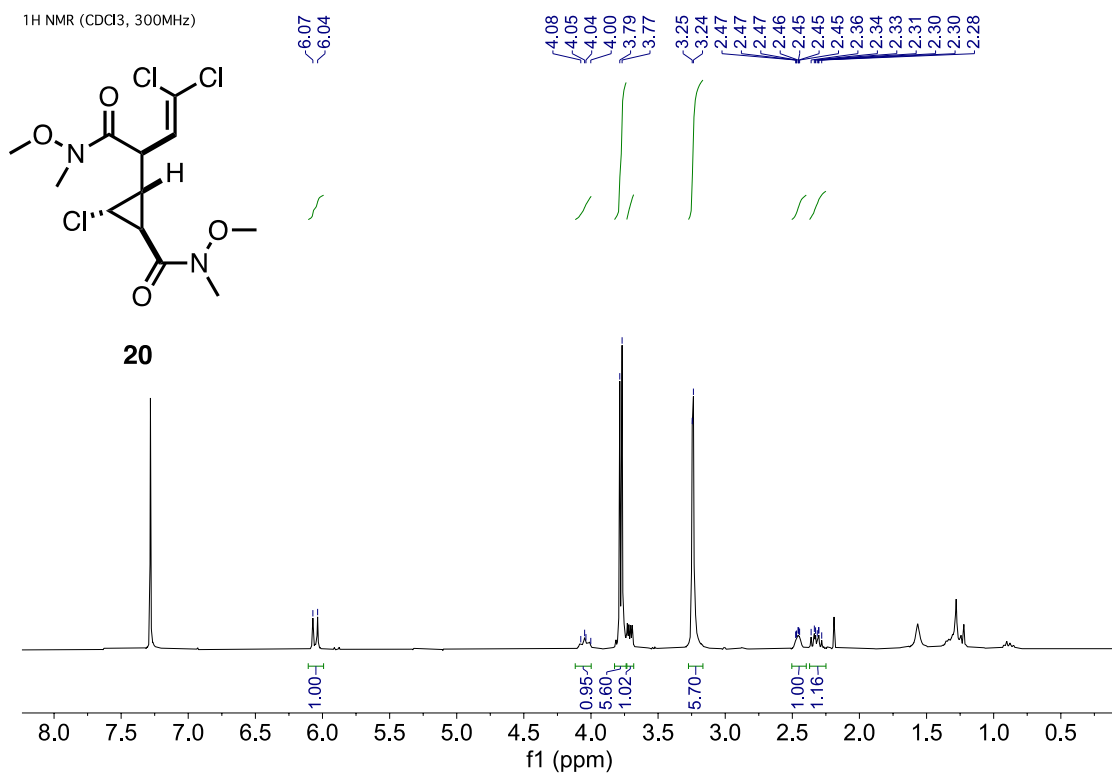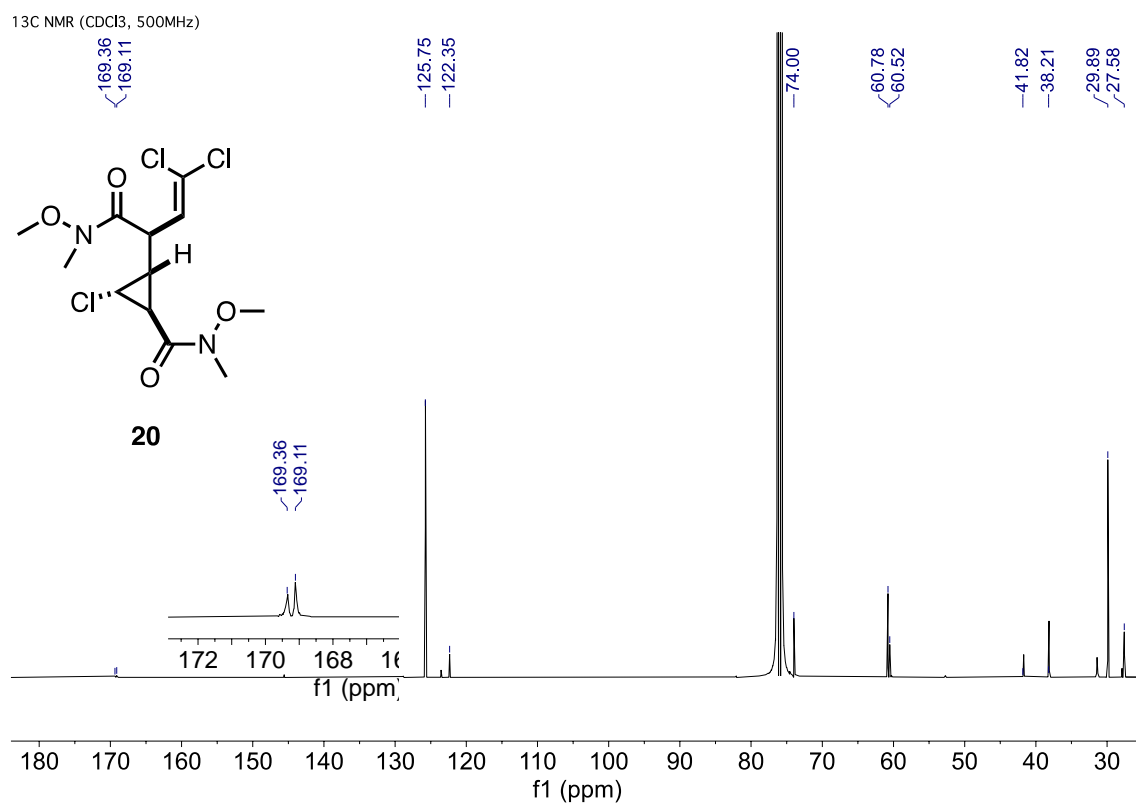

## 9. Stereochemical determination of products by NOESY experiment

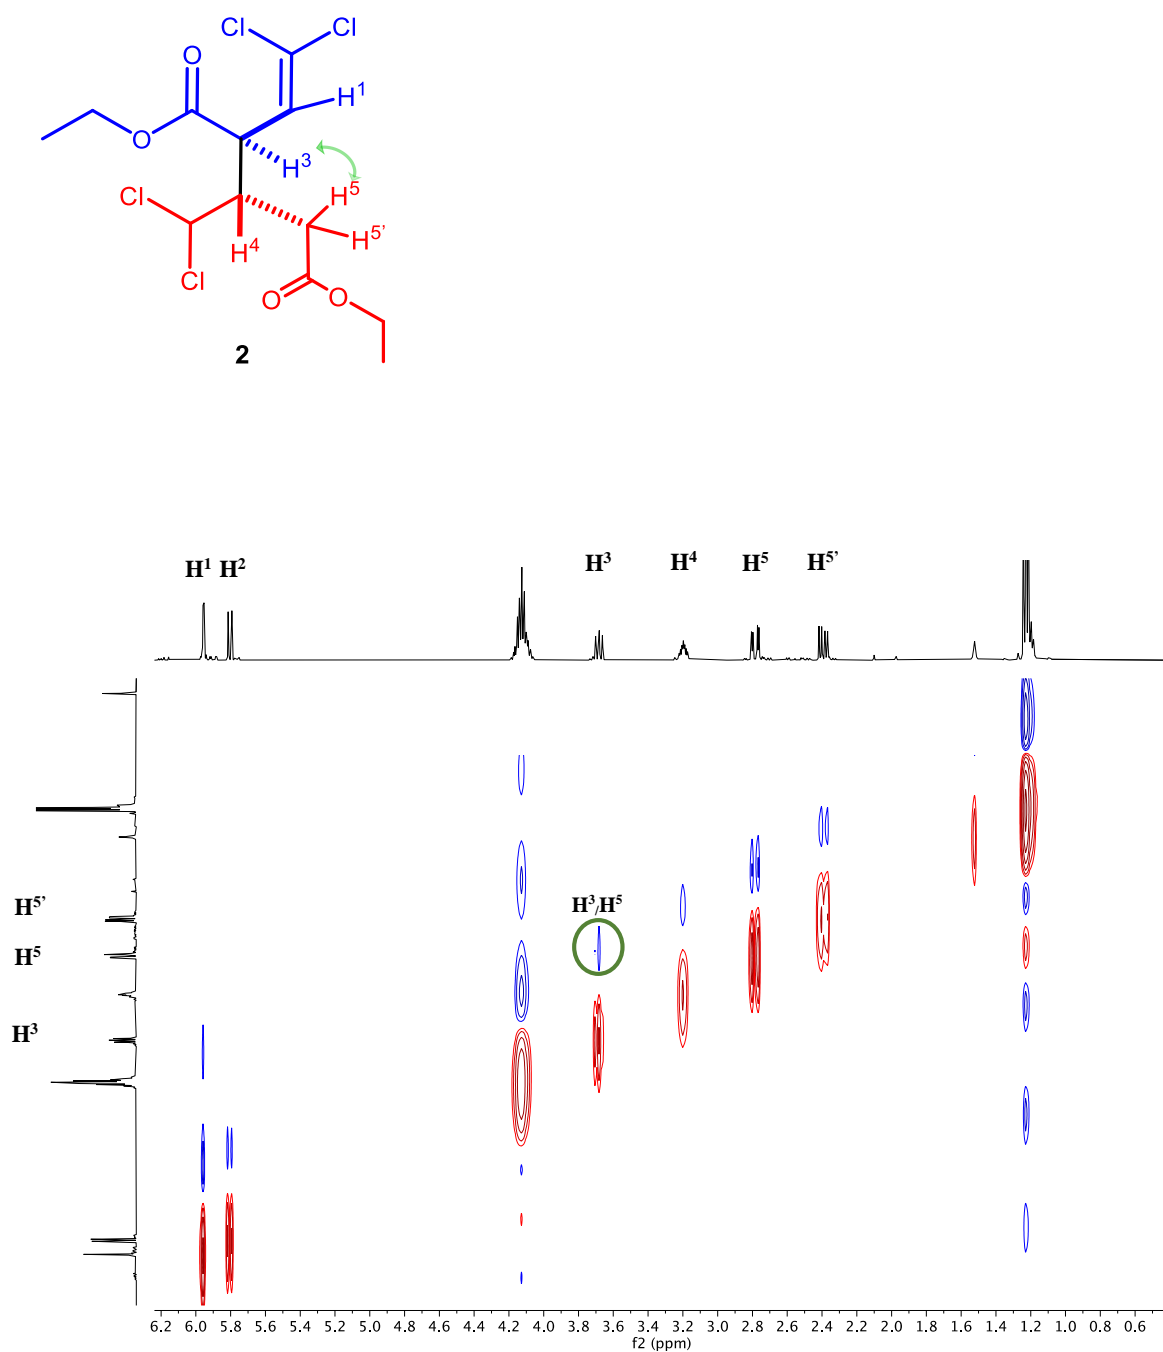

The cross peak between  $H^3/H^5$  indicates that these protons are on the same side of the molecule. This supports the proposed stereochemistry.

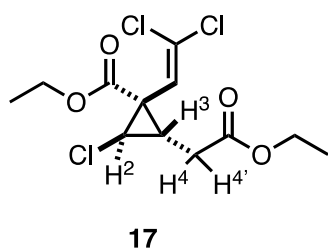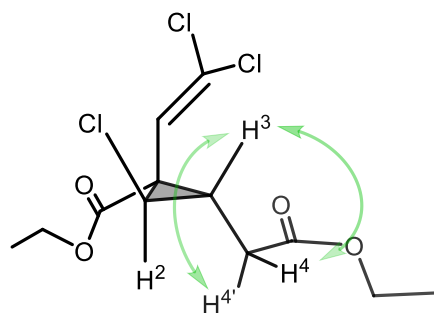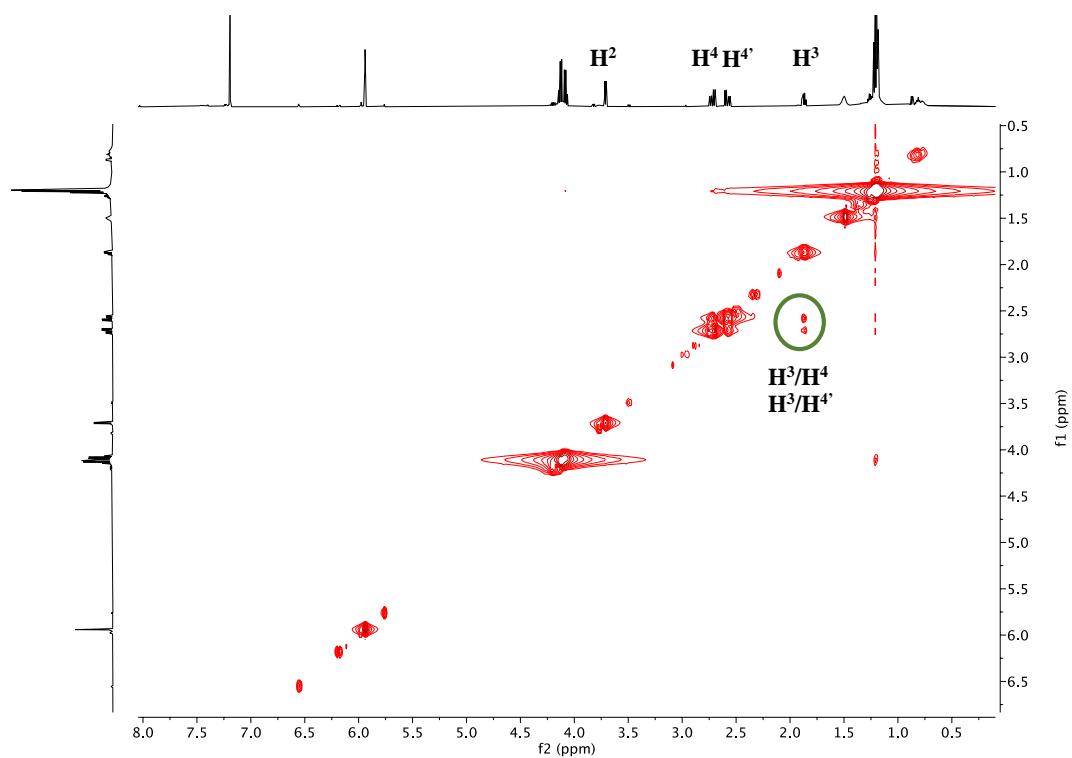

The single cross peak observed for cyclopropane protons  $H^3$  and  $H^2$  is the cross peak between  $H^3/H^5$  (highlighted in green) due to the vicinal proximity of both carbons. The absence of cross peaks between  $H^3$  and  $H^2$  suggests that these protons are on opposite sides of the cyclopropane ring.

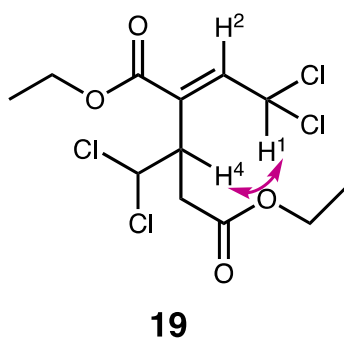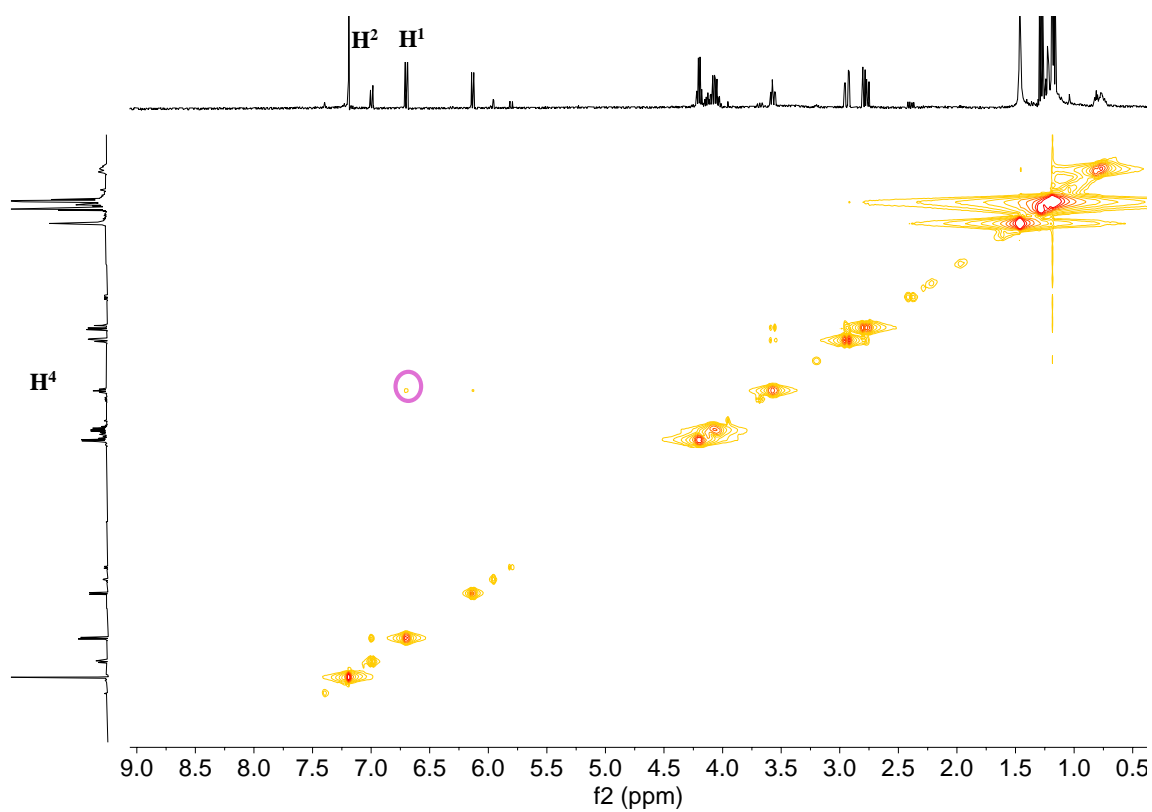

The cross peak between  $H^4/H^1$  indicates that these protons are close in space so the configuration of the molecule is *E*.

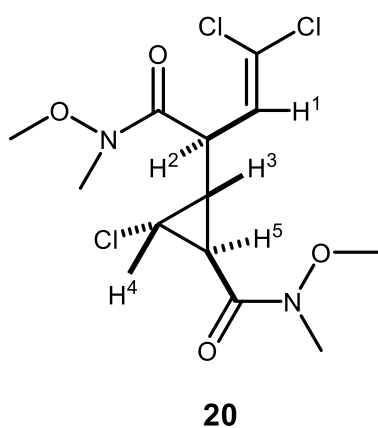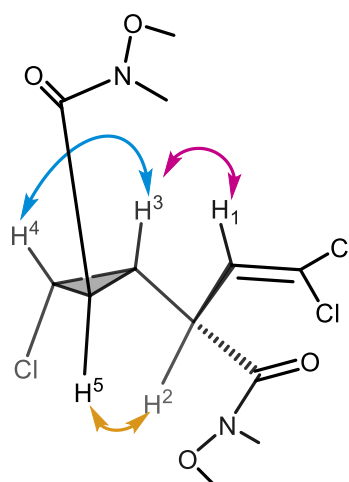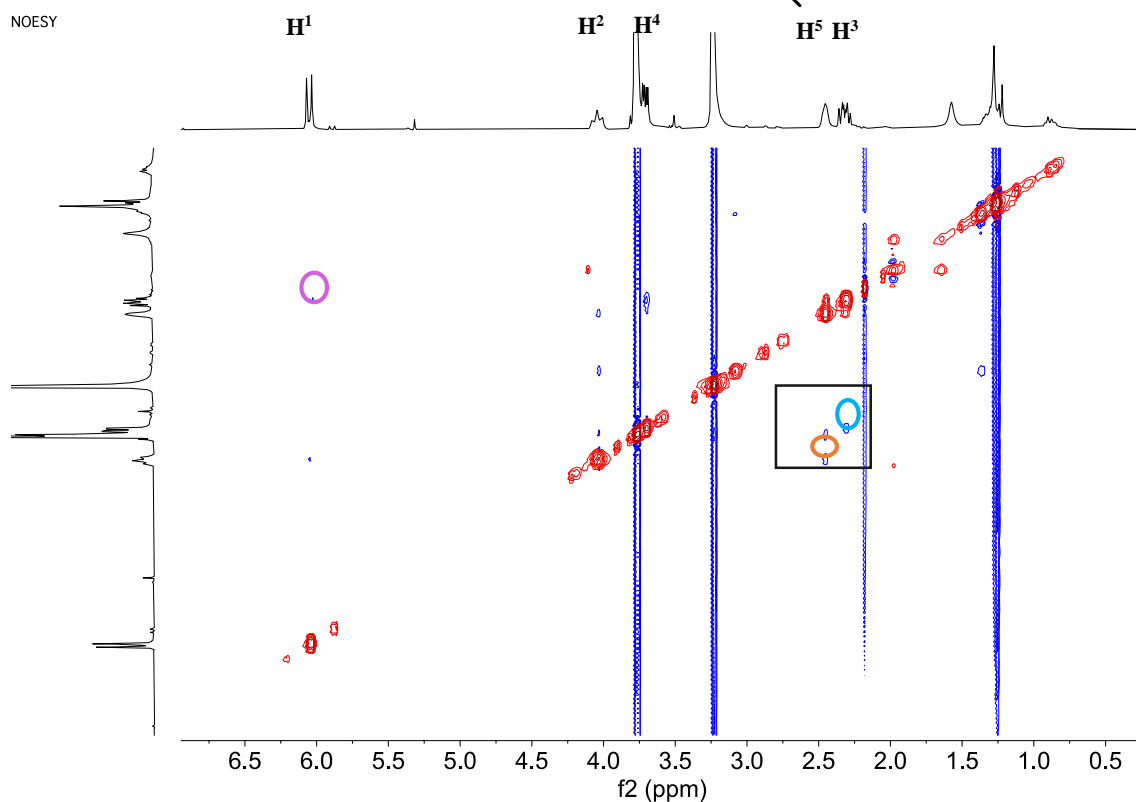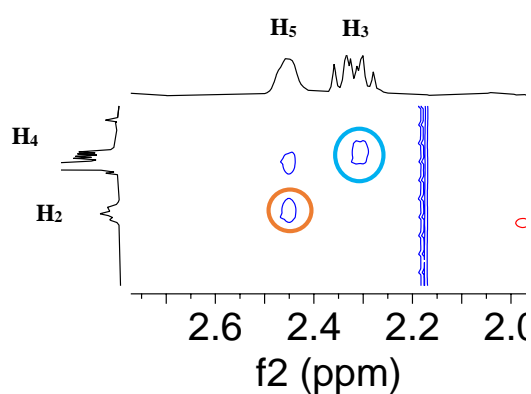

The cross peaks between H<sup>3</sup>/H<sup>4</sup> (blue) and H<sup>2</sup>/H<sup>5</sup> (orange) indicate that each pair of protons are on each side of the cyclopropane ring. Moreover, cross peaks between H<sup>3</sup>/H<sup>1</sup> (pink) and H<sup>2</sup>/H<sup>5</sup> (orange) support the relative configuration of the exocyclic stereocenter.
